# Supplementary material for: Women's role in sanitation decision making in rural coastal Odisha, India
Source: PLoS One. 2017 May 24;12(5):e0178042. doi: 10.1371/journal.pone.0178042 (PMC5443550; doi:10.1371/journal.pone.0178042)
Supplement: S2 File — (XLSX) [file pone.0178042.s002.xlsx]

## Sheet: DM  - Questionaire
SURVEY TO ASSESS HOUSEHOLD DECISION MAKING
	Date of survey ..............	Village Name/code ..............
	Household ID : ..................	Enumerator code : ..................
1	Resondent's Name ଉତରଦାତାଙ୍କ ନାମ	................
2	Age of the respondent ଉତରଦାତାଙ୍କ ବୟସ	................
SECTION A : DEMOGRAPHIC AND SOCIO- ECONOMIC STATUS ସାମାଜିକ ଓ ଅର୍ଥନୈତିକ ସ୍ଥିତି
3	Caste ଜାତି	General ସାଧାରଣ	01
		Other backward class (OBC) ଅନ୍ୟ ପଛୁଆ ବର୍ଗ	02
		Scheduled caste (SC) ଅନୁସୂଚିତ ଜାତି	03
		Scheduled tribe (ST) ଅନୁସୂଚିତ ଜନଜାତି	04
		Can't say/ Don't know ଜଣା ନାହିଁ	99
4	Family Type (presently) ପରିବାରର ପ୍ରକାର	Joint ଯୌଥ ପରିବାର	01
		Nuclear ମୌଳିକ ପରିବାର	02
5	Family Composition (nos.) Dont Tick. Note down the no. Of persons in each group ପରିବାରର ରଚନା. ପ୍ରତି ବର୍ଗରେ କେତେ ଲୋକ, ମୋଟ ସଂଖ୍ୟା ଲେଖନ୍ତୁ	Parents (male head) ବାପା
		Parents ( female head) ମା
		Married Sons / married men ବିବାହିତ ପୁଅ
		Daughter in law / married females ବୋହୂ
		Unmarried Sons > 15 yrs 15 ବର୍ଷରୁ ଉର୍ଦ୍ଧ୍ୱ ଅବିବାହିତ ପୁଅ
		Unmarried Daughter > 15 yrs 15 ବର୍ଷରୁ ଉର୍ଦ୍ଧ୍ୱ ଅବିବାହିତ ଝିଅ
		Children (boys & girls) < 15 yrs 15 ବର୍ଷରୁ ସାନ ଛୁଆ(ପୁଅ ଓ ଝିଅ)
		Married daughters ବିବାହିତ ଝିଅ
		Any others ଅନ୍ୟାନ୍ୟ
6	Persons living in this household presently?	ବର୍ତ୍ତମାନ ଆପଣଙ୍କ ଘରେ କେତେଜଣ ସଦସ୍ୟ ରହୁଛନ୍ତି ?	......
7	Educational status of MALE head ? ଘରର ପୁରୁଷ ମୁଖ୍ୟଙ୍କ ଶିକ୍ଷାଗତ ଯୋଗ୍ୟତା?	None (illiterate) ଅଶିକ୍ଷିତ	01
		Primary (1 - 5th class) ପ୍ରାଥମିକ(1-5 ଶ୍ରେଣୀ)	02
		Junior Secondary (6-10th class) ମାଧ୍ୟମିକ(6-10 ଶ୍ରେଣୀ)	03
		Senior Secondary (11 - 12th claas) ଉଚ୍ଚ ମାଧ୍ୟମିକ(11-12)	04
		Graduation/College କଲେଜ/ମହାବିଦ୍ୟାଳୟ	05
		University ବିଶ୍ୱବିଦ୍ୟାଳୟ	06
		No male head ପୁରୁଷ ମୁଖ୍ୟ ନାହାଁନ୍ତି	07
8	Educational status of FEMALE head? ଘରର ମହିଳା ମୁଖ୍ୟଙ୍କ ଶିକ୍ଷାଗତ ଯୋଗ୍ୟତା?	None (illiterate) ଅଶିକ୍ଷିତ	01
		Primary (1 - 5th class) ପ୍ରାଥମିକ(1-5 ଶ୍ରେଣୀ)	02
		Junior Secondary (6-10th class) ମାଧ୍ୟମିକ(6-10 ଶ୍ରେଣୀ)	03
		Senior Secondary (11 - 12th claas) ଉଚ୍ଚ ମାଧ୍ୟମିକ(11-12)	04
		Graduation/College କଲେଜ/ମହାବିଦ୍ୟାଳୟ	05
		University ବିଶ୍ୱବିଦ୍ୟାଳୟ	06
9	Does your family own agricultural land ? ଆପଣଙ୍କ ପରିବାରର ନିଜର ଚାଷ ଜମି ଅଛି କି ?	Yes ହଁ	01
		No ନାଁ	02
10	Occupation of the MALE head ? Multiple choice ଘରର ମୁଖିଆ(ପୁରୁଷ) ଙ୍କ ପେଶା ? ଏକ ରୁ ଅଧିକ ଉତ୍ତର ହେଇପାରେ, ପ୍ରତ୍ୟେକ ଉତ୍ତରକୁ ଗୋଲ ବୁଲାନ୍ତୁ	Farming in own land ନିଜ ଜମିରେ ଚାଷ	01
		Share cropping ଭାଗ ଚାଷି	02
		Labour/Mason ମୂଲିଆ/ରାଜମିସ୍ତ୍ରୀ	03
		Govt./Private job ସରକାରି/ବେସରକାରୀ ଚାକିରି	04
		Business (Small) ବ୍ୟବସାୟ(ଛୋଟ)	05
		Business (big) ବ୍ୟବସାୟ(ବଡ)	06
		Unemployed ବେରୋଜଗାର	07
		No male head ପୁରୁଷ ମୁଖ୍ୟ ନାହାଁନ୍ତି	08
		Others (Specify) ଅନ୍ୟାନ୍ୟ(ବର୍ଣ୍ଣନା)
11	Occupation of the FEMALE head ? Multiple choice ଘରର ମୁଖିଆ(ମହିଳା) ଙ୍କ ପେଶା ? ଏକ ରୁ ଅଧିକ ଉତ୍ତର ହେଇପାରେ, ପ୍ରତ୍ୟେକ ଉତ୍ତରକୁ ଗୋଲ ବୁଲାନ୍ତୁ	Farming in own land ନିଜ ଜମିରେ ଚାଷ	01
		Share cropping ଭାଗ ଚାଷି	02
		Labour/Mason ମୂଲିଆ/ରାଜମିସ୍ତ୍ରୀ	03
		Govt./Private job ସରକାରି/ବେସରକାରୀ ଚାକିରି	04
		Business (Small) ବ୍ୟବସାୟ(ଛୋଟ)	05
		Business (big) ବ୍ୟବସାୟ(ବଡ)	06
		Unemployed ବେରୋଜଗାର	07
		Others (Specify) ଅନ୍ୟାନ୍ୟ(ବର୍ଣ୍ଣନା)
12	Other than male/female head, any other earning member in the family? ଘରର ମୁଖ୍ୟ ପୁରୁଷ/ମହିଳାଙ୍କ ବ୍ୟତୀତ, ଅନ୍ୟ କେହି ରୋଜଗାର କରନ୍ତି କି?	Yes ହଁ	01
		No ନାଁ	02
13	Total number of earning members in the family ?	ସମୁଦାୟ ପରିବାରରେ କେତେ ଜଣ ସଦସ୍ୟ ରୋଜଗାର କରନ୍ତି ?	.....
14	Family Income/Month (adding up income of all earning members) ପରିବାରର ମାସିକ ଆୟ/ରୋଜଗାର (ସମସ୍ତଙ୍କ ରୋଜଗାର ମିଶିକରି)	5000 ରୁ କମ୍	01
		5000 ରୁ 10000 ଭିତରେ	02
		10000 ରୁ 20000 ଭିତରେ	03
		20000 ରୁ ଅଧିକ	04
15	Does any member own the following items in your house? (observe, ask, and select) ମୁଁ ଏବେ କିଛି ଜିନିଷ ପଢିବି, ଆପଣ ଘରେ ଏହା ମଧ୍ୟରୁ କେଉଁ କେଉଁ ଜିନିଷ ଅଛି ଘରେ ଅଛି, ମୋତେ କହିବେ? (ଦେଖ, ପଚାର ଓ ଲେଖ)	Mobile ମୋବାଇଲ୍	01
		Television ଟିଭି	02
		Bicycle ସାଇକେଲ	03
		Motor cycle / Scooter ମୋଟର୍ ସାଇକେଲ୍/ସ୍କୁଟର	04
		Refrigerator ଫ୍ରୀଜ	05
		Car/ Auto କାର୍/ଅଟୋ	06
		Truck/ Mini truck ଟ୍ରକ୍/ ମିନି ଟ୍ରକ	07
		Water pump ପାଣି ପମ୍ପ	08
		Tractor ଟ୍ରାକ୍ଟର	09
16	Who in your family had the final say to purchase a TV? ଆପଣଙ୍କ ପରିବାରରେ ଟିଭି କିଣିବା ପାଇଁ ଶେଷ ନିଷ୍ପତ୍ତି କାହାର ଥିଲା ?	Husband alone କେବଳ ପତି	01
		Respondent alone ଉତ୍ତରଦାତା	02
		Respondent & husband jointly ଉତ୍ତରଦାତା ଓ ପତି ଉଭୟ	03
		Husband and someone else ପତି ଓ ଅନ୍ୟ କେହି	04
		Respondent &someone else ଉତ୍ତରଦାତା ଓ ଅନ୍ୟ କେହି	05
		Someone else ଅନ୍ୟ କେହି	06
		If someone else, Specify ଯଦି ଅନ୍ୟ କେହି, ବର୍ଣ୍ଣନା ...
17	Do you or your spouse own a house? ଆପଣଙ୍କର ନିଜର ଘର ଅଛି କି ?	Yes ହଁ	01
		No ନାଁ (If 'NO' go to Q 22)	02
18	Did you or your spouse build this house, or inherited? ଆପଣ ନିଜେ ଏହି ଘର ତିଆରି କରିଛନ୍ତି ବା ପୂର୍ବଜଙ୍କର ?	Built self ନିଜେ ତିଆରି	01
		Inherited ବଂଶାନୁଗତ / ପୈତୃକ	02
		Someone else ଅନ୍ୟ କେହି	03
		If someone else, Specify ଯଦି ଅନ୍ୟ କେହି, ବର୍ଣ୍ଣନା ...
19	In the past 5-10 years, has any 'major' additions to the existing house been made or upgraded? (changed the roof, built a new room, etc.) ଗତ 5 - 10 ବର୍ଷରେ, ଆପଣ ରହୁଥିବା ଘରେ କୌଣସି ଜରୁରୀ ପରିବର୍ତ୍ତନ ବା ଉନ୍ନତି/ତିଆରି କରିଛନ୍ତି କି (ଯେପରିକି ନୂଆ ଛାତ, ନୂଆ ଘର ଆଦି)?	Yes ହଁ	01
		No ନାଁ (If 'NO', go to Q22)	02
20	What major change you did to the house? କଣ ଜରୁରୀ ପରିବର୍ତ୍ତନ ବା ଉନ୍ନତି/ତିଆରି କରିଛନ୍ତି Multiple answers (ଏକ ରୁ ଅଧିକ ଉତ୍ତର ହେଇପାରେ)	Improved the roof ଚାଳ ରୁ ଟାଇଲ, ଟିଣ, ଆଜବେଷ୍ଟ	01
		Changed the walls ମାଟି କାନ୍ଥରୁ ଇଟା କାନ୍ଥ	02
		Added new rooms ନୂଆ କୋଠରି/ରୁମ୍ ବନେଇଲୁ (ମାଟି ଘର)	03
		Added new rooms ନୂଆ କୋଠରି/ରୁମ୍ ବନେଇଲୁ (କୋଠା ଘର)	04
		Constructed a new house କୋଠା ଘର ତିଆରି କରିଛୁ	05
		Any other ଅନ୍ୟାନ୍ୟ
21	Who in your family had the final say to upgrade the house, or make additions? ଆପଣଙ୍କ ଘର ତିଆରି ବା ଉନ୍ନତି କରିବା ପାଇଁ, ପରିବାରରେ କିଏ ଶେଷ /ଅନ୍ତିମ ନିଷ୍ପତ୍ତି ନେଇଥିଲେ ?	Husband alone କେବଳ ପତି	01
		Respondent alone ଉତ୍ତରଦାତା	02
		Respondent & husband jointly ଉତ୍ତରଦାତା ଓ ପତି ଉଭୟ	03
		Husband and someone else ପତି ଓ ଅନ୍ୟ କେହି	04
		Respondent &someone else ଉତ୍ତରଦାତା ଓ ଅନ୍ୟ କେହି	05
		Someone else ଅନ୍ୟ କେହି	06
		If someone else, Specify ଯଦି ଅନ୍ୟ କେହି, ବର୍ଣ୍ଣନା ...
22	Do you own livestock or farm animals? ଆପଣଙ୍କର ପାଳନ୍ତା ପଶୁ ବା ଚାଷ ପାଇଁ ପଶୁ ଅଛନ୍ତି କି ?	Yes ହଁ	01
		No ନାଁ If 'NO' Go to Q 25	02
23	In last 5 years, have you purchased a cow/ calf/ buffalo/ bull? ବିଗତ 5 ବର୍ଷ ମଧ୍ୟରେ, ଆପଣ ଗାଈ/ବାଛୁରୀ/ମଇଁଷି/ବଳଦ କିଣିଛନ୍ତି କି?	Yes ହଁ	01
		No ନାଁ If 'NO' Go to Q 25	02
24	Who in the family had a final say to purchase cattle or farm animals? ଆପଣଙ୍କ ପରିବାରରେ ଗାଈ ଗୋରୁ ବା ପଶୁ କିଣିବାରେ ଶେଷ ନିଷ୍ପତ୍ତି କାହାର ଥିଲା?	Husband alone କେବଳ ପତି	01
		Respondent alone ଉତ୍ତରଦାତା	02
		Respondent & husband jointly ଉତ୍ତରଦାତା ଓ ପତି ଉଭୟ	03
		Husband and someone else ପତି ଓ ଅନ୍ୟ କେହି	04
		Respondent &someone else ଉତ୍ତରଦାତା ଓ ଅନ୍ୟ କେହି	05
		Someone else ଅନ୍ୟ କେହି	06
		If someone else, Specify ଯଦି ଅନ୍ୟ କେହି, ବର୍ଣ୍ଣନା ...
25	Who in your family usually has the final say on - Determining your own health care? ଆପଣଙ୍କ ସ୍ୱାସ୍ଥ୍ୟ ଓ ଯତ୍ନ ସମ୍ବନ୍ଧୀୟ, ଶେଷ ନିଷ୍ପତ୍ତି ପ୍ରାୟତଃ ପରିବାରରେ କିଏ ନିଅନ୍ତି ?	Husband alone କେବଳ ପତି	01
		Respondent alone ଉତ୍ତରଦାତା	02
		Respondent & husband jointly ଉତ୍ତରଦାତା ଓ ପତି ଉଭୟ	03
		Husband and someone else ପତି ଓ ଅନ୍ୟ କେହି	04
		Respondent &someone else ଉତ୍ତରଦାତା ଓ ଅନ୍ୟ କେହି	05
		Someone else ଅନ୍ୟ କେହି	06
		If someone else, Specify ଯଦି ଅନ୍ୟ କେହି, ବର୍ଣ୍ଣନା ...
26	Who in your family usually has the final say on - *Making large household purchases? ଘରର ଅଧିକା ମୂଲ୍ୟର ଆସବାବ ପତ୍ର କିଣିବା ପାଇଁ, ଆପଣଙ୍କ ପରିବାରରେ ଶେଷ ନିଷ୍ପତ୍ତି ପ୍ରାୟତଃ କିଏ ନିଅନ୍ତି ?	Husband alone କେବଳ ପତି	01
		Respondent alone ଉତ୍ତରଦାତା	02
		Respondent & husband jointly ଉତ୍ତରଦାତା ଓ ପତି ଉଭୟ	03
		Husband and someone else ପତି ଓ ଅନ୍ୟ କେହି	04
		Respondent &someone else ଉତ୍ତରଦାତା ଓ ଅନ୍ୟ କେହି	05
		Someone else ଅନ୍ୟ କେହି	06
		If someone else, Specify ଯଦି ଅନ୍ୟ କେହି, ବର୍ଣ୍ଣନା ...
		No large purchases କିଛି ବଡ ଜିନିଷ କିଣା ହେଇନି	07
27	Who in your family usually has the final say on - Making household purchases for daily needs ? ଘରର ପ୍ରତିଦିନିଆ ଖର୍ଚ୍ଚ ପାଇଁ, ଆପଣଙ୍କ ପରିବାରରେ ଶେଷ ନିଷ୍ପତ୍ତି ପ୍ରାୟତଃ କିଏ ନିଅନ୍ତି ?	Husband alone କେବଳ ପତି	01
		Respondent alone ଉତ୍ତରଦାତା	02
		Respondent & husband jointly ଉତ୍ତରଦାତା ଓ ପତି ଉଭୟ	03
		Husband and someone else ପତି ଓ ଅନ୍ୟ କେହି	04
		Respondent &someone else ଉତ୍ତରଦାତା ଓ ଅନ୍ୟ କେହି	05
		Someone else ଅନ୍ୟ କେହି	06
		If someone else, Specify ଯଦି ଅନ୍ୟ କେହି, ବର୍ଣ୍ଣନା ...
28	Who in your family usually has the final say on - *Visiting family and relatives ? ପରିବାର ଓ ବନ୍ଧୁବାନ୍ଧବଙ୍କ ଘରକୁ ଯିବା ପାଇଁ, ଆପଣଙ୍କ ପରିବାରରେ ଶେଷ ନିଷ୍ପତ୍ତି ପ୍ରାୟତଃ କିଏ ନିଅନ୍ତି ?	Husband alone କେବଳ ପତି	01
		Respondent alone ଉତ୍ତରଦାତା	02
		Respondent & husband jointly ଉତ୍ତରଦାତା ଓ ପତି ଉଭୟ	03
		Husband and someone else ପତି ଓ ଅନ୍ୟ କେହି	04
		Respondent &someone else ଉତ୍ତରଦାତା ଓ ଅନ୍ୟ କେହି	05
		Someone else ଅନ୍ୟ କେହି	06
		If someone else, Specify ଯଦି ଅନ୍ୟ କେହି, ବର୍ଣ୍ଣନା ...
29	Who in your family usually has the final say on -*Deciding what to prepare for daily meals? *ପ୍ରତିଦିନର ଖାଦ୍ୟ ପ୍ରସ୍ତୁତି ପାଇଁ, ଆପଣଙ୍କ ପରିବାରରେ ଶେଷ ନିଷ୍ପତ୍ତି ପ୍ରାୟତଃ କିଏ ନିଅନ୍ତି ?	Husband alone କେବଳ ପତି	01
		Respondent alone ଉତ୍ତରଦାତା	02
		Respondent & husband jointly ଉତ୍ତରଦାତା ଓ ପତି ଉଭୟ	03
		Husband and someone else ପତି ଓ ଅନ୍ୟ କେହି	04
		Respondent &someone else ଉତ୍ତରଦାତା ଓ ଅନ୍ୟ କେହି	05
		Someone else ଅନ୍ୟ କେହି	06
		If someone else, Specify ଯଦି ଅନ୍ୟ କେହି, ବର୍ଣ୍ଣନା ...
30	Do you have your own tube well at home? ଆପଣଙ୍କ ନିଜର ଟିୱେଲ ଅଛି କି?	Yes ହଁ	01
		No ନାଁ (If 'No' SKIP to Q32)	02
31	Who in your family had the final say to instal a tubewell? ଟିୱେଲ ବସେଇବା ପାଇଁ ଆପଣଙ୍କ ପରିବାରରେ ଶେଷ ନିଷ୍ପତ୍ତି କାହାର ଥିଲା?	Husband alone କେବଳ ପତି	01
		Respondent alone ଉତ୍ତରଦାତା	02
		Respondent & husband jointly ଉତ୍ତରଦାତା ଓ ପତି ଉଭୟ	03
		Husband and someone else ପତି ଓ ଅନ୍ୟ କେହି	04
		Respondent &someone else ଉତ୍ତରଦାତା ଓ ଅନ୍ୟ କେହି	05
		Someone else ଅନ୍ୟ କେହି	06
		If someone else, Specify ଯଦି ଅନ୍ୟ କେହି, ବର୍ଣ୍ଣନା ...
32	Do you have any type of latrine at home? ଆପଣଙ୍କ ଘରେ ଯେ କୌଣସି ପ୍ରକାର ପାଇଖାନା ଅଛି କି?	Yes ହଁ	01
		No ନାଁ (If 'NO', GO TO 48)	02
33	How was the latrine built ? ପାଇଖାନାଟି କେମିତି ତିଆରି କରିଛନ୍ତି?	Self financed ନିଜ ପଇସାରେ ବନେଇଛନ୍ତି	01
		By govt. ସରକାର ଦେଇଥିବା ପାଇଖାନା	02
		Govt. subsidy + self finance ସରକାରି ସବସିଡି + ନିଜ ପଇସା	03
SEC B : ASK HOUSEHOLDS WITH A LATRINE (ପାଇଖାନା ଥିବା ଘରମାନଙ୍କୁ ଏହି ପ୍ରଶ୍ନ ପଚାରନ୍ତୁ)
34	Who in your family had the final say to build a latrine? ପାଇଖାନା ତିଆରି କରିବା ପାଇଁ ଆପଣଙ୍କ ପରିବାରରେ ଶେଷ ନିଷ୍ପତ୍ତି କାହାର ଥିଲା?	Husband alone କେବଳ ପତି	01
		Respondent alone ଉତ୍ତରଦାତା	02
		Respondent & husband jointly ଉତ୍ତରଦାତା ଓ ପତି ଉଭୟ	03
		Husband and someone else ପତି ଓ ଅନ୍ୟ କେହି	04
		Respondent &someone else ଉତ୍ତରଦାତା ଓ ଅନ୍ୟ କେହି	05
		Someone else ଅନ୍ୟ କେହି	06
		If someone else, Specify ଯଦି ଅନ୍ୟ କେହି, ବର୍ଣ୍ଣନା ...
35	Who in your family had the final say to identify the location/site of the latrine? ପାଇଖାନା ର ଜାଗା ନିର୍ଦ୍ଧାଯ୍ୟ କରିବାରେ, ପରିବାରରେ ଶେଷ ନିଷ୍ପତ୍ତି କାହାର ଥିଲା?	Husband alone କେବଳ ପତି	01
		Respondent alone ଉତ୍ତରଦାତା	02
		Respondent & husband jointly ଉତ୍ତରଦାତା ଓ ପତି ଉଭୟ	03
		Husband and someone else ପତି ଓ ଅନ୍ୟ କେହି	04
		Respondent &someone else ଉତ୍ତରଦାତା ଓ ଅନ୍ୟ କେହି	05
		Someone else ଅନ୍ୟ କେହି	06
		If someone else, Specify ଯଦି ଅନ୍ୟ କେହି, ବର୍ଣ୍ଣନା ...
36	Who in your family had the final say to purchase raw materials for latrine construction? ପାଇଖାନା ପାଇଁ ସାମଗ୍ରୀ କିଣିବା ପାଇଁ, ପରିବାରରେ ଶେଷ ନିଷ୍ପତ୍ତି କାହାର ଥିଲା?	Husband alone କେବଳ ପତି	01
		Respondent alone ଉତ୍ତରଦାତା	02
		Respondent & husband jointly ଉତ୍ତରଦାତା ଓ ପତି ଉଭୟ	03
		Husband and someone else ପତି ଓ ଅନ୍ୟ କେହି	04
		Respondent &someone else ଉତ୍ତରଦାତା ଓ ଅନ୍ୟ କେହି	05
		Someone else ଅନ୍ୟ କେହି	06
		If someone else, Specify ଯଦି ଅନ୍ୟ କେହି, ବର୍ଣ୍ଣନା ...
37	Who in your family had the final say in arranging mason for building latrine? ପାଇଖାନା ତିଆରି କରିବା ପାଇଁ ରାଜମିସ୍ତ୍ରୀ ଯୋଗାଡ ପାଇଁ କିଏ ପରିବାରରେ ଶେଷ ନିଷ୍ପତ୍ତି ନେଇଥିଲେ ?	Husband alone କେବଳ ପତି	01
		Respondent alone ଉତ୍ତରଦାତା	02
		Respondent & husband jointly ଉତ୍ତରଦାତା ଓ ପତି ଉଭୟ	03
		Husband and someone else ପତି ଓ ଅନ୍ୟ କେହି	04
		Respondent &someone else ଉତ୍ତରଦାତା ଓ ଅନ୍ୟ କେହି	05
		Someone else ଅନ୍ୟ କେହି	06
		If someone else, Specify ଯଦି ଅନ୍ୟ କେହି, ବର୍ଣ୍ଣନା ...
38	Who spent money to build latrine? ପାଇଖାନା ତିଆରି କରିବାରେ, କିଏ ପଇସା ଖର୍ଚ୍ଚ କରିଥିଲେ?	Husband alone କେବଳ ପତି	01
		Respondent alone ଉତ୍ତରଦାତା	02
		Respondent & husband jointly ଉତ୍ତରଦାତା ଓ ପତି ଉଭୟ	03
		Husband and someone else ପତି ଓ ଅନ୍ୟ କେହି	04
		Respondent &someone else ଉତ୍ତରଦାତା ଓ ଅନ୍ୟ କେହି	05
		Someone else ଅନ୍ୟ କେହି	06
		If someone else, Specify ଯଦି ଅନ୍ୟ କେହି, ବର୍ଣ୍ଣନା ...
39	For whom was the latrine mainly built? (multiple answers possible) ମୁଖ୍ୟତଃ କାହା ପାଇଁ ପାଇଖାନାଟି ତିଆରି ହୋଇଥିଲା? (ଏକ ରୁ ଅଧିକ ଉତ୍ତର ଚିହ୍ନଟ କରନ୍ତୁ)	Female head ଘରର ମୁଖ୍ୟ ମହିଳା	01
		Daughter in law ବୋହୂ	02
		Other females ଅନ୍ୟ ମହିଳା ସଦସ୍ୟ	03
		Male head ଘରର ମୁଖ୍ୟ ପୁରୁଷ	04
		Other Males ଅନ୍ୟ ପୁରୁଷ ସଦସ୍ୟ	05
		All HH members ଘରର ସମସ୍ତ ସଦସ୍ୟ	06
		Children ଛୁଆ	07
		Old & aged family members ବୃଦ୍ଧ ଓ ବୟସ୍କ ସଦସ୍ୟଙ୍କ ପାଇଁ	08
SECTION C : LATRINE FUNCTIONALITY STATUS (ପାଇଖାନା ଚଳାଚଳ ଅବସ୍ଥା)
40	Is the latrine functional ? ପାଇଖାନାଟି ବ୍ୟବହାର ଯୋଗ୍ୟ/ଚଳାଚଳ ଅବସ୍ଥାରେ ଅଛି କି ?	Yes ହଁ	01
		No ନାଁ (If 'No', then go to 44 after Physical Verification)	02
41	Is the latrine currently in use? ବର୍ତ୍ତମାନ ପାଇଖାନାଟି ବ୍ୟବହାର ହେଉଛି କି ?	Yes ହଁ (If 'Yes', then ask Q 42, and END THE SURVEY)	01
		No ନାଁ (If 'No', then go to 43, and END THE SURVEY)	02
42	Which family members, regularly use the latrine? (multiple answers possible) ପରିବାର ର କେଉଁ ସଦସ୍ୟ ସର୍ବଦା ପାଇଖାନାଟି ବ୍ୟବହାର କରୁଛନ୍ତି? (ଏକରୁ ଅଧିକ ଉତ୍ତର ହେଇପାରେ)	Female head ଘରର ମହିଳା ମୁଖ୍ୟ	01
		Daughter in law ବୋହୂ	02
		Other females ଅନ୍ୟ ମହିଳା ସଦସ୍ୟ	03
		Male head ଘରର ମୁଖ୍ୟ ପୁରୁଷ	04
		Other Males ଅନ୍ୟ ପୁରୁଷ ସଦସ୍ୟ	05
		All HH members ଘରର ସମସ୍ତ ସଦସ୍ୟ	06
		Children ଛୁଆ	07
		Old & aged family members ବୃଦ୍ଧ ଓ ବୟସ୍କ ସଦସ୍ୟଙ୍କ ପାଇଁ	08
43	Why the latrine is not in use? ପାଇଖାନାଟି କାହିଁକି ବ୍ୟବହାର ହେଉ ନାହିଁ?	No water facility ପାଣିର ସୁବିଧା ନାହିଁ	01
		Newly built ଆ ତିଆରି ହେଇଛି	02
		...................................	03
		..................................	04
		Any other (specify) ଅନ୍ୟ କିଛି(ବର୍ଣ୍ଣନା)
SECTION D : LATRINE NON FUNCTIONALITY STATUS (ପାଇଖାନା ଅଚଳ ଅବସ୍ଥା)
44	Why is the latrine not functional? ପାଇଖାନାଟି କାହିଁକି ଅଚଳ ଅବସ୍ଥାରେ ଅଛି?	Latrine incomplete ପାଇଖାନା ସମ୍ପୂର୍ଣ୍ଣ ତିଆରି ସରିନି	01
		Latrine/pit broken ପାଇଖାନା/ଟାଙ୍କି ଭାଙ୍ଗିଯାଇଛି	02
		Latrine damaged ପାଇଖାନା ନଷ୍ଟ ହେଇଯାଇଛି	03
		Any other (specify) ଅନ୍ୟ କିଛି(ବର୍ଣ୍ଣନା)
45	Who in the family wanted a latrine ? (multiple answers possible) - NO PROMPTS କେଉଁ ସଦସ୍ୟ ପାଇଖାନାଟେ ଚାହୁଁଥିଲେ? ପ୍ରମ୍ପଟିଂ କରନ୍ତୁ ନାହିଁ	Female head ଘରର ମୁଖ୍ୟ ମହିଳା	01
		Daughter in law ବୋହୂ	02
		Other females ଅନ୍ୟ ମହିଳା ସଦସ୍ୟ	03
		Male head ଘରର ମୁଖ୍ୟ ପୁରୁଷ	04
		Other Males ଅନ୍ୟ ପୁରୁଷ ସଦସ୍ୟ	05
		All HH members ଘରର ସମସ୍ତ ସଦସ୍ୟ	06
		Children ଛୁଆ	07
		Old & aged family members ବୃଦ୍ଧ ଓ ବୟସ୍କ ସଦସ୍ୟ	08
46	Why was the latrine not completed/ finished/repaired? ପାଇଖାନାଟି ମରାମତି/ସମ୍ପୂର୍ଣ୍ଣ କାହିଁକି କରାଯାଇନି?	Lack of finance ଅର୍ଥର ଅଭାବ	01
		................................................	02
		................................................	03
		...............................................	04
47	Who in the family is responsible to make the latrine functional? ପାଇଖାନା ଉପଯୋଗି କରିବା ପାଇଁ, ଘରର କେଉଁ ସଦସ୍ୟର ଦାୟିତ୍ୱ ?	Husband ପତି	01
		Respondent ଉତ୍ତରଦାତା	02
		Son ପୁଅ	03
		Someone else ଅନ୍ୟ କେହି	04
		If someone else , Specify ଯଦି ଅନ୍ୟ କେହି , ବର୍ଣ୍ଣନା.
SECTION E : ASK HOUSEHOLDS WITHOUT A LATRINE (ପାଇଖାନା ନଥିବା ଘର ମାନଙ୍କୁ ପଚାରନ୍ତୁ)
48	Were you motivated by anyone to build a latrine? କେହି, ପାଇଖାନା ତିଆରି କରିବା ପାଇଁ ଉସାହିତ କରିଛନ୍ତି କି?	Yes ହଁ	01
		No ନାଁ	02
49	Who in the family had expressed to have a latrine ? (multiple resonse possible) ପରିବାରରେ କେଉଁ ସଦସ୍ୟ ପାଇଖାନା ତିଆରି କରିବା ପାଇଁ ଆଗ୍ରହ ପ୍ରକାଶ କରିଥିଲେ? ଏକ ରୁ ଅଧିକ ଉତ୍ତର ହେଇପାରେ	Female head ଘରର ମହିଳା ମୁଖ୍ୟ	01
		Daughter in law ବୋହୂ	02
		Other females ଅନ୍ୟ ମହିଳା ସଦସ୍ୟ	03
		Male head ଘରର ପୁରୁଷ ମୁଖିଆ	04
		Other Males ଅନ୍ୟ ପୁରୁଷ ସଦସ୍ୟ	05
		All HH members ଘରର ସମସ୍ତ ସଦସ୍ୟ	06
		Old & aged family members ବୃଦ୍ଧ ଓ ବୟସ୍କ ସଦସ୍ୟ	07
		No one କେହି ନୁହେଁ	08
50	Reasons - why a latrine was not built? (multipe answers possible) Rank them କେଉଁ କାରଣ ଯୋଗୁ, ଆପଣ ଏ ପର୍ଯ୍ୟନ୍ତ ପାଇଖାନା ଟିଏ ବନେଇ ନାହାନ୍ତି ? ଏକ ରୁ ଅଧିକ ଉତ୍ତର ହେଇପାରେ	Lack of finances ଅର୍ଥର ଅଭାବ
		Lack of space ଜାଗାର ଅଭାବ
		Lack of water ପାଣିର ଅଭାବ
		Male head was not interested ପୁରୁଷ ମୁଖ୍ୟ ଆଗ୍ରହ ନାହାନ୍ତି
		Other family members not interested ଘରର ଅନ୍ୟ ସଦସ୍ୟ ଆଗ୍ରହ ନାହାନ୍ତି
		Dependent on husband/other male members to build ସ୍ୱାମୀ/ଅନ୍ୟ ପୁରୁଷ ସଦସ୍ୟଙ୍କ ଉପରେ ନିର୍ଭର କରିବାକୁ ପଡେ
		Other (specify) ଅନ୍ୟାନ୍ୟ(ବର୍ଣ୍ଣନା)
51	Would you ever build a latrine? ଆପଣ ଭବିଷ୍ୟତରେ ପାଇଖାନା ତିଆରି କରିବେ କି ?	Yes ହଁ	01
		No ନାଁ	02
		Not sure / Can't say ଜଣା ନାହିଁ	03
52	If ever you build a latrine, then, who in the family would have the final say to build the latrine? ଯଦି ବି କେବେ ପାଇଖାନା ତିଆରି କରନ୍ତି, ତେବେ ଆପଣଙ୍କ ପରିବାର ର କେଉଁ ସଦସ୍ୟ ଶେଷ ନିଷ୍ପତ୍ତି ନେବେ?	Husband alone କେବଳ ପତି	01
		Respondent alone ଉତ୍ତରଦାତା	02
		Respondent & husband jointly ଉତ୍ତରଦାତା ଓ ପତି ଉଭୟ	03
		Husband & someone else ପତି ଓ ଅନ୍ୟ କେହି	04
		Respondent &someone else ଉତ୍ତରଦାତା ଓ ଅନ୍ୟ କେହି	05
		Someone else ଅନ୍ୟ କେହି	06
		If someone else, Specify ଯଦି ଅନ୍ୟ କେହି, ବର୍ଣ୍ଣନା ...
	Any other comments or remarks :
