# Supplementary material for: Women's role in sanitation decision making in rural coastal Odisha, India
Source: PLoS One. 2017 May 24;12(5):e0178042. doi: 10.1371/journal.pone.0178042 (PMC5443550; doi:10.1371/journal.pone.0178042)
Supplement: S3 File — (XLSX) [file pone.0178042.s003.xlsx]

## Sheet: HH DECISION MAKING
SANITATION DECISION MAKING IN RURAL ODISHA - DATA SET
date	household	Block	village	enumerator	h1	h2	a3	a4	a5a	a5b	a5c	a5d	a5e	a5f	a5g	a5h	a5i	a6	a7	a8	a9	a10a	a10b	a10c	a10d	a10e	a10f	a10g	a10h	a10i	a10j	a11a	a11b	a11c	a11d	a11e	a11f	a11g	a11h	a11i	a12	a13	a14	a15a	a15b	a15c	a15d	a15e	a15f
					Resondent's Name	Age of the respondent	Caste	Family Type (presently)	Parents (male head)	Parents (female head)	Married Sons / married men	Daughter in law / married females	Unmarried Sons > 15 yrs yrs	Unmarried Daughter > 15 yrs	Children (boys & girls)	Married daughters	Any others	Persons living in this household presently	Educational status of MALE head	Educational status of FEMALE head	Does your family own agricultural land	Farming in own land	Share cropping	Labour/Mason	Govt./Private job	Business (Small)	Business (big)	Unemployed	No male head	Others	Specify	Farming in own land	Share cropping	Labour/Mason	Govt./Private job	Business (Small)	Business (big)	Unemployed	Others	Specify	Other than male/female head, any other earning member in the family	Total number of earning members in the family	Family Income/Month	Mobile	Television	Bicycle	Motor cycle /Scooter	Refrigerator	Car/ Auto
2015-12-29	302001	302	Nuagaon	1	Labani Behera	56	3	2	1	1	1	1		1	1			6	2	1	1	1				5										5					1	3	1	1	2	3	4
2015-12-29	302002	302	Nuagaon	1	Ahalya Nayak	42	1	2	1	1			1	1			1	5	3	3	1	1																7			2	1	2	1		3
2015-12-29	302003	302	Nuagaon	1	Nayani Nayak	55	1	2	1	1				1				3	2	2	1	1		3														7			2	1	1	1		3
2015-12-29	302004	302	Nuagaon	1	Raji Nayak	65	1	2	1	1					4	2	1	9	3	1	1							7										7			1	1	1	1		3
2015-12-29	302005	302	Nuagaon	1	Sajani Nayak	62	1	2	1	1	2	2			4			10	3	2	1							7										7			1	2	2	1	2	3	4
2015-12-29	302006	302	Nuagaon	1	Sunita Bhatta	28	1	2	1	1					1		1	4	4	3	2		2	3														7			1	2	2	1		3	4	5
2015-12-29	302007	302	Nuagaon	1	Basanti Bhatta	52	1	2		1			2					3	7	1	1								8							5					1	2	2			3
2015-12-29	302008	302	Nuagaon	1	Tulasi Bhatta	46	1	2	1	1			2					4	2	2	1	1		3														7			1	3	3	1		3
2015-12-29	302009	302	Nuagaon	1	Sujata Behera	33	2	2	1	1					2		1	5	3	3	1	1				5												7			2	1	3	1	2	3	4
2015-12-29	302010	302	Nuagaon	1	Hulasha Behera	43	2	2	1	1			2					4	2	1	1	1	2	3														7			1	3	3	1		3
2015-12-29	302011	302	Nuagaon	1	Laxmipriya Behera	52	2	2	1	1	1	1	2					6	2	2	1	1		3														7			1	2	2	1		3
2015-12-29	302012	302	Nuagaon	1	Lalita Behera	55	2	2	1	1	1	1	1					5	3	2	1							7										7			1	1	2	1	2	3
2015-12-29	302013	302	Nuagaon	1	Sanjukta Pradhan	38	1	2	1	1					2		1	5	3	3	1	1	2	3														7			2	1	2	1		3
2015-12-29	302014	302	Nuagaon	1	Sanjukta Pradhan	52	1	2	1	1	2	2	1		4		2	13	1	1	1	1		3														7			1	3	2	1	2	3	4
2015-12-29	302015	302	Nuagaon	1	Sajani Parida	55	1	2	1	1			2					4	1	1	2			3														7			1	2	2	1		3
2015-12-29	302016	302	Nuagaon	1	Basanta Pradhan	58	1	2	1	1	2	2		1	4			11	2	1	1	1		3														7			1	3	2	1	2	3	4
2015-12-29	302017	302	Nuagaon	1	Raji Dei	70	1	2		1	1	1			2			5	7	1	2								8									7			1	1	1	1		3
2015-12-29	302301	302	Nuagaon	4	Baguli Behera	50	3	2	1	1	1	1	1	1				6	2	1	1	1				5												7			1	2	2	1	2	3	4
2015-12-29	302302	302	Nuagaon	4	Saudamini Nayak	50	1	2	1	1	2	2	2	1	1			10	2	2	1							7									6				1	2	3	1	2	3	4
2015-12-29	302303	302	Nuagaon	4	Puspalata Nayak	35	1	2	1	1			1		2			5	3	3	1	1													4						1	2	2	1	2	3
2015-12-29	302304	302	Nuagaon	4	Kalpana Nayak	25	1	2	1	1						1	1	4	4	4	1	1				5												7			2	1	2	1	2	3	4
2015-12-29	302305	302	Nuagaon	4	Rajani Bhata	70	1	2		1	1	1	1		1			5	7	2	2								8									7			1	1	1	1		3
2015-12-29	302306	302	Nuagaon	4	Sujata Nayak	35	1	2	1	1					2			4	3	3	1	1	2															7			2	1	1	1
2015-12-29	302307	302	Nuagaon	4	Sulochana Bhatta	45	1	2		1				2	3			6	7	2	2								8						4						2	1	1			3
2015-12-29	302308	302	Nuagaon	4	Rabi Behera	45	2	2		1					1	1	1	4	7	3	2								8						4						2	1	1	1	2
2015-12-29	302309	302	Nuagaon	4	Sunamani Behera	52	2	2		1			1	1	1			4	7	2	1								8									7			1	1	1	1		3
2015-12-29	302310	302	Nuagaon	4	Nalini Nayak	50	1	2	1	1	1	1	2				1	7	3	3	1	1				5												7			1	2	2	1	2	3
2015-12-29	302311	302	Nuagaon	4	Sailabala Swain	36	1	2	1	1			1	1				4	3	2	1	1		3														7			2	1	1	1		3
2015-12-29	302312	302	Nuagaon	4	Budhi Pradhan	50	1	2		1	1	1	1		2			6	7	1	1								8									7			1	1	1	1	2	3
2015-12-29	302313	302	Nuagaon	4	Renubala Pradhan	25	1	2			1	1		1	1			4	3	3	1	1		3														7			2	1	2	1	2	3
2015-12-29	302314	302	Nuagaon	4	Netramani Pradhan	55	1	2		1	1	1						3	7	2	1								8						4						1	2	2	1	2	3		5
2015-12-29	302315	302	Nuagaon	4	Sasmita Pradhan	23	1	2			1	1			1		1	4	2		1			3																	1	2	2	1	2	3
2015-12-29	302316	302	Nuagaon	4	Mamata Pradhan	32	1	2			1	1			2		1	5	3	3	2			3														7			2	1	1	1	2	3	4
2015-12-23	401001	401	Kajisahi	1	Gitanjali Parida	45	1	2	1	1			1	1	1		1	6	5	3	1	1																7			2	1	2	1	2	3	4
2015-12-23	401002	401	Kajisahi	1	Taramani Parida	62	1	2	1	1	2	2	1		2			9	3	1	1	1	2															7			1	4	3	1	2	3	4	5
2015-12-23	401003	401	Kajisahi	1	Urmila Parida	40	1	2	1	1			2	1				5	3	3	1	1																7			2	1	2	1	2	3
2015-12-23	401004	401	Kajisahi	1	Swarnalata Parida	40	1	2	1	1			1	1	1			5	3	3	1	1																7			2	1	1	1		3
2015-12-23	401005	401	Kajisahi	1	Sasi Mahala	72	2	2		1	1	1			2			5	7	1	1								8					3							1	2	1			3
2015-12-23	401006	401	Kajisahi	1	Kuntala Parida	70	1	2	1	1	3	3	2		2			12	2	2	1							7										7			1	3	3	1	2	3	4
2015-12-23	401007	401	Kajisahi	1	Labanya Parida	62	1	2	1	1	2	2			1			7	3	2	1	1																7			1	3	2	1	2	3	4
2015-12-23	401008	401	Kajisahi	1	Sasi Swain	65	1	2	1	1	1	1			2			6	2	1	2							7										7			1	1	1	1		3
2015-12-23	401009	401	Kajisahi	1	Mamita Swain	30	1	2	1	1				1	1		1	5	3	3	2			3														7			1	2	2	1		3
2015-12-23	401101	401	Kajisahi	3	Harsamani Parida	65	1	2		1	1	1			1			4	7	2	1								8									7			1	1	1	1	2	3
2015-12-23	401102	401	Kajisahi	3	Binodini Parida	40	1	2	1	1					2			4	3	2	1	1																7			2	1	1	1		3
2015-12-23	401103	401	Kajisahi	3	Santilata Parida	53	1	2	1	1				3				5	3	3	1	1																7			2	1	2	1		3
2015-12-23	401104	401	Kajisahi	3	Draupati Parida	41	1	2		1			1	1				3	7	2	1								8						4						2	1	1	1		3
2015-12-23	401105	401	Kajisahi	3	Santilata Parida	45	1	2		1			2	1			1	5	7	1	1								8									7			2	0		1	2	3
2015-12-23	401106	401	Kajisahi	3	Sukanti Parida	58	1	2	1	1			1	1				4	5	1	1							7										7			2	0	1	1	2	3
2015-12-23	401107	401	Kajisahi	3	Haras Swain	65	1	2	1	1	1	1			1			5	1	1	1	1										1									1	3	1	1
2015-12-23	401301	401	Kajisahi	4	Hulashamani Parida	48	1	1	1	1	1	1	2					6	2	2	1	1																7			1	2	2	1		3
2015-12-23	401302	401	Kajisahi	4	Jhunamani Parida	27	1	2	1	1					2			4	4	3	1	1																7			2	1	1	1		3	4
2015-12-23	401303	401	Kajisahi	4	Sashi Behera	60	2	2	1	1	2	2			2			8	2	1	1	1		3														7			1	2	1	1		3
2015-12-23	401304	401	Kajisahi	4	Sabitri Behera	46	2	2	1	1			2					4	2	1	1	1		3														7			2	1	1	1	2	3
2015-12-23	401305	401	Kajisahi	4	Pramila Behera	56	2	2	1	1	1	1			1			5	2	1	1	1		3														7			1	2	1	1	2	3	4
2015-12-23	401306	401	Kajisahi	4	Sukanti Swain	40	1	2	1	1	1	1	1					5	3	2	1	1		3														7			1	2	2	1	2	3	4
2015-12-23	401307	401	Kajisahi	4	Basanti Swain	50	1	2	1	1			1					3	3	1	1	1		3								1									2	1	1
2015-12-23	401308	401	Kajisahi	4	Sanjukta Sahoo	32	1	2	1	1					2			4	3	2	1	1																7			2	1	2	1	2	3
2015-12-23	401309	401	Kajisahi	4	Harasha Sahoo	38	1	2	1	1	1	1			1		1	6	2	2	1	1		3														7			1	2	2	1
2015-12-23	401310	401	Kajisahi	4	Nishamani Mahala	37	2	2	1	1				1	1			4	5	3	1		2							99	Knitting							7			2	1	1	1		3
2015-12-23	401311	401	Kajisahi	4	Manjulata Parida	26	1	2	1	1					1		2	5	3	3	1	1																7			2	1	2	1	2	3
2015-12-28	403001	403	Sanagaon	1	Sisula Pradhan	62	1		1	1	1	1	1		1			6	2	1	1									99	Pension							7			1	2	3	1	2	3	4
2015-12-28	403002	403	Sanagaon	1	Santi Behera	40	2	2	1	1	1				1			4	2	1	2			3														7			2	1	1			3
2015-12-28	403003	403	Sanagaon	1	Kusum Behera	48	2	2	1	1	1							3	2	1	2		2	3														7			2	1	2	1	2	3
2015-12-28	403004	403	Sanagaon	1	Radha Sahu	52	1	2	1	1	1	1			1			5	1	2	1	1	2	3														7			1	2	3	1	2	3
2015-12-28	403005	403	Sanagaon	1	Binodini Pradhan	48	1	2	1	1	2	2			1		1	8	2	1	1	1	2	3														7			1	3	3	1	2	3	4	5
2015-12-28	403006	403	Sanagaon	1	Santilata Jena	55	1	2	1	1	1	1	1	1				6	3	2	1	1																7			1	3	3	1		3
2015-12-28	403007	403	Sanagaon	1	Basanti Pradhan	40	1	2	1	1	2			1				5	5	3	1	1				5												7			2	1	2	1	2	3
2015-12-28	403008	403	Sanagaon	1	Babina Jena	36	1	2	1	1	1				1			4	2	2	1	1		3														7			2	1	1			3
2015-12-28	403009	403	Sanagaon	1	Labanga Pradhan	50	1	2	1	1			1					3	3	1	1	1		3														7			2	1	1	1
2015-12-28	403010	403	Sanagaon	1	Prabhasini Badhei	34	1	2	1	1								2	3	3	2					5										5					2	2	2	1	2
2015-12-28	403011	403	Sanagaon	1	Sarita Badhei	30	1	2	1	1					2			4	3	3	2					5										5					2	2	2	1	2	3	4
2015-12-28	403012	403	Sanagaon	1	Sukanti Jena	45	1	2	1	1			1					3	2	2	2		2	3														7			1	2	2	1	2	3	4
2015-12-28	403013	403	Sanagaon	1	Kumari Swain	55	1	2	1	1	1	1			4			8	2	1	2		2	3									2	3							1	3	2	1	2	3	4
2015-12-28	403014	403	Sanagaon	1	Sukanti Pradhan	40	1	2	1	1			1					3	2	2	2		2	3										3							2	2	1	1		3
2015-12-28	403301	403	Sanagaon	4	Tulasi Swain	35	2	2	1	1			1	2				5	2	3	2			3														7			1	2	2	1	2	3
2015-12-28	403302	403	Sanagaon	4	Rajani Behera	60	2	2	1	1	1	1			3			7	2	1	1							7										7			1	1	2	1	2	3	4
2015-12-28	403303	403	Sanagaon	4	Jati Behera	75	2	2	1	1	1	1						4	1	2	2							7										7			1	1	2	1	2
2015-12-28	403304	403	Sanagaon	4	Keshari Sahoo		1	2	1	1			2	1				5	2	1	1	1				5												7			1	3	3	1		3
2015-12-28	403305	403	Sanagaon	4	Manorama Sahoo	35	1	2	1	1			2					4	2	2	2		2	3														7			2	1	2	1	2	3
2015-12-28	403306	403	Sanagaon	4	Manju Dei	46	1	2	1	1								2	1	3	1	1		3														7			2	1	2		2	3
2015-12-28	403307	403	Sanagaon	4	Kabita Pradhan	35	1	2	1	1			2	1				5	3	2	1	1																7			2	2	2	1	2	3
2015-12-28	403308	403	Sanagaon	4	Bidulata Jena	45	1	2	1	1			1	1				4	2	2	1	1	2															7			1	2	1	1		3	4
2015-12-28	403309	403	Sanagaon	4	Kanti Jena	35	1	2	1	1					1	1	1	5	2	1	2		2			5												7			2	1	2	1	2	3
2015-12-28	403310	403	Sanagaon	4	Ramamani Jena	44	1	2	1	1			2					4	3	2	1	1			4													7			1	2	3	1	2	3	4
2015-12-28	403311	403	Sanagaon	4	Sajani Jena	38	1	2	1	1			2					4	2	1	1	1																7			2	1	1	1	2	3	4
2015-12-28	403312	403	Sanagaon	4	Parei Dei	49	1	2	1	1	1	1			2		1	7	2	2	2	1																7			1	2	2	1	2	3
2015-12-28	403313	403	Sanagaon	4	Dhaki Jena	48	1	2	1	1								2	2	1	2		2															7			2	1	1		2
2015-12-28	403314	403	Sanagaon	4	Santilata Pradhan	50	1	2	1	1	1	1					1	5	2	1	1	1																7			1	2	2	1	2	3		5
2015-12-28	403315	403	Sanagaon	4	Rasabati Jena	80	1	2		1	1	1	1	1				5	7	1	1								8									7			1	1	2	1		3
2015-12-22	404001	404	Nalihana	1	Ramamani Behera	48	3	2	1	1	1	1	2		1			7	3	2	1	1		3										3							1	3	2	1		3
2015-12-22	404002	404	Nalihana	1	Sabitri Dash	47	1	2	1	1								2	5	3	2					5												7			2	1	2	1	2	3	4	5
2015-12-22	404003	404	Nalihana	1	Ranga Das	70	2	1	1	1	2	3		3	2	1		13	1	1	2		2			5												7			1	2	2	1	2	3
2015-12-22	404004	404	Nalihana	1	Benga Behera	68	2	2		1	1		1		1	1		5	7	1	1								8									7			1	1	2	1	2	3
2015-12-22	404005	404	Nalihana	1	Banita Behera	45	3	2	1	1	2							4	2	1	1	1		3														7			1	3	3	1		3	4	5
2015-12-22	404006	404	Nalihana	1	Tuna Jena	40	1	2	1	1				2	1			5	3	3	1				4													7			2	1	3	1	2	3
2015-12-22	404007	404	Nalihana	1	Sujata Nanda	40	1	2	1	1			1					3	3	3	1					5												7			1	2	2	1	2	3
2015-12-22	404008	404	Nalihana	1	Rinamani Panda	53	1	2	1	1			1	1				4	3	2	1							7										7			1	1	2	1	2	3
2015-12-22	404009	404	Nalihana	1	Pramila Panda	58	1	2	1	1			1					3	3	2	1							7										7			1	1	2	1	2	3
2015-12-22	404010	404	Nalihana	1	Manarama Panda	45	1	2	1	1			1					3	3	2	2	1																7			1	2	2	1	2	3
2015-12-22	404011	404	Nalihana	1	Tilotama Panda	57	1	2	1	1	2	2			2			8	2	2	1							7										7			1	2	2	1	2	3
2015-12-22	404012	404	Nalihana	1	Gangamani Panda	67	1	2		1					2	1	1	5	7	2	2								8										99	Pension	1	2	1		2
2015-12-22	404013	404	Nalihana	1	Mini Panda	55	1	2	1	1	1	1	1		1			6	3	2	1							7										7			1	2	3	1	2	3	4	5
2015-12-22	404014	404	Nalihana	1	Sabita Mahapatra	52	1	2	1	1		1	2				2	7	4	3	1	1	2															7			2	1	1	1	2	3
2015-12-22	404015	404	Nalihana	1	Pratima Nayak	42	1	2	1	1			2	1	1		1	7	3	3	2									99	Astrologer							7			1	3	3	1	2	3	4
2015-12-22	404016	404	Nalihana	1	Laxmipriya Mallik	55	3	2	1	1	1	1		1				5	2	3	1	1				5												7			1	2	4	1	2	3	4	5
2015-12-22	404017	404	Nalihana	1	Bishnupriya Kuanar	32	1	2	1	1					1			3	5	3	1					5												7			2	1	2	1	2	3	4
2015-12-22	404018	404	Nalihana	1	Rama Muduli	60	2	2		1	2	2			3			8	7	1	2								8									7			1	2	2	1	2	3	4
2015-12-22	404019	404	Nalihana	1	Susama Behera	45	2	2	1	1			1				2	5	3	2	1	1		3		5												7			2	1	2	1	2	3
2015-12-22	404020	404	Nalihana	1	Ranga Behera	42	2	2	1	1			2					4	3	3	1	1		3														7			1	3	2	1	2	3
2015-12-22	404021	404	Nalihana	1	Sulochana Behera	43	2	2	1	1				2			1	5	4	4	1	1				5									4						2	2	2	1	2	3
2015-12-22	404022	404	Nalihana	1	Soudamini Behera	32	2	2	1	1					2			4	5	4	1				4													7			2	1	2	1	2	3
2015-12-22	404023	404	Nalihana	1	Nayana Bhatta	44	1	2	1	1	2	2			2			8	2	2	1	1		3		5												7			1	3	3	1	2	3	4	5	6
2015-12-22	404301	404	Nalihana	4	Tikina Behera	47	3	2	1	1			1	1				4	1	1	1	1		3										3							1	3	2	1		3
2015-12-22	404302	404	Nalihana	4	Suma Panda	46	1	2	1	1			2					4	3	2	2									99	Keeping cows							7			1	2	2	1	2	3
2015-12-22	404303	404	Nalihana	4	Sabitri Kar	60	1	2		1			1					2	7	2	1								8			1		3							1	2	1	1	2
2015-12-22	404304	404	Nalihana	4	Anjana Jena	51	1	2	1	1			2	1				5	4	3	1				4										4						2	2	4	1	2	3	4	5
2015-12-22	404305	404	Nalihana	4	Mani Patra	35	1	2	1	1			1		2			5	2	2	2			3														7			2	1	1	1	2	3
2015-12-22	404306	404	Nalihana	4	Manjulata Jena	75	1	2		1	1	1	1		2			6	7	3	1								8									7			1	2	4	1	2	3	4	5	6
2015-12-22	404307	404	Nalihana	4	Laxmipriya Panda	66	1	2	1	1	3	3	4		4			16	2	2	1							7										7			1	5	4	1	2	3	4	5
2015-12-22	404308	404	Nalihana	4	Jhunu Panda	40	1	2	1	1			2	1				5	2	3	1	1				5												7			2	1	2	1	2	3
2015-12-22	404309	404	Nalihana	4	Laxmipriya Panda	51	1	2	1	1	1	1			1			5	2	2	1							7										7			1	1	2	1	2	3
2015-12-22	404310	404	Nalihana	4	Rajani Panda	60	1	2	1	1	3	2			4			11	3	2	1	1																7			1	2	2	1	2	3
2015-12-22	404311	404	Nalihana	4	Surjyamani Panda	72	1	2		1	1	1		1	1			5	7	2	1								8									7			1	1	2	1	2	3	4	5
2015-12-22	404312	404	Nalihana	4	Anupama Panda	47	1	2	1	1	1	1	1					5	2	3	1				4													7			1	2	1		2	3	4
2015-12-22	404313	404	Nalihana	4	Swarnalata Mahapatra	45	1	2	1	1			2		1			5	3	2	1	1																7			1	3	2	1		3
2015-12-22	404314	404	Nalihana	4	Binita Kumari Mallick	66	3	2	1	1	1	1		1				5	3	3	1							7										7			1	1	2	1	2		4
2015-12-22	404315	404	Nalihana	4	Hemalata Kunar	50	1	1		1	3	2		3	1			11	2	1	1	1																7			1	3	2	1	2	3
2015-12-22	404316	404	Nalihana	4	Bidulata Muduli	50	2	2	1	1	2	2	1					7	2	2	2	1		3														7			1	3	2	1		3
2015-12-22	404317	404	Nalihana	4	Kanak Muduli	56	2	2	1	1	2	2		1	3			10	2	2	2			3														7			1	4	2	1	2	3
2015-12-22	404318	404	Nalihana	4	Padmabati Behera	40	1	2	1	1	2	2	1	1	2			10	2	2	1	1		3														7			1	3	2	1	2	3
2015-12-22	404319	404	Nalihana	4	Sita Behera	48	1	2	1	1	2	2	1		2			9	1	1	1	1		3														7			1	3	4	1	2	3	4	5
2015-12-22	404320	404	Nalihana	4	Sulochana Behera	45	1	2	1	1	1	1	1					5	1	1	1	1																7			1	2	2	1	2	3
2015-12-22	404321	404	Nalihana	4	Jemani Bhata	55	1	2	1	1	4	3	1		5			15	2	2	1	1																7			1	4	3	1	2	3	4
2015-12-16	405001	405	Suabari	1	Sulochana Pradhan	57	1	2	1	1			2					4	3	3	1	1																7			1	2	2	1		3	4
2015-12-16	405002	405	Suabari	1	Bhaba Pradhan	75	1	1		1	2	2	2	1	3			11	7	2	1								8									7			1	3	2	1	2	3	4	5
2015-12-16	405003	405	Suabari	1	Jharana Pradhan	58	1	2	1	1	1	1	1		1			6	3	3	1				4													7			1	2	3	1	2	3	4
2015-12-16	405004	405	Suabari	1	Ruma Behera	70	1	2	1	1	2	2			3			9	2	2	1							7										7			1	2	3	1	2	3	4	5
2015-12-16	405005	405	Suabari	1	Nila Pradhan	57	1	2	1	1	1	1	1		1			6	3	2	1	1																7			1	3	3	1	2	3	4
2015-12-16	405006	405	Suabari	1	Bidulata Pradhan	62	1	2	1	1	2	2	1		3			10	4	3	1									99	Pension							7			1		4	1	2	3	4	5
2015-12-16	405007	405	Suabari	1	Mina Pradhan	58	1	2	1	1			3					5	2	2	1	1																7			1	2	2	1	2	3	4
2015-12-16	405008	405	Suabari	1	Ramamani Pradhan	65	1	2	1	1	1	1			2			6	2	2	1	1		3														7			1	2	2	1	2
2015-12-16	405009	405	Suabari	1	Rambhamani Baliarsingh	62	1	2	1	1	2	2			3			8	5	3	1									99	Pension							7			1	3	4	1	2	3	4	5
2015-12-16	405010	405	Suabari	1	Satyabhama Pradhan	53	1	2	1	1				2	1			5	1	1	1	1		3															99	Cooking in school	2	2	1	1
2015-12-16	405011	405	Suabari	1	Gunirani Swain	56	1	2	1	1			1	2			1	6	3	2	1	1	2															7			2	1	1	1		3
2015-12-16	405012	405	Suabari	1	Lata Swain	65	1	2	1	1	2	2			3			9	3	3	1	1																7			1	3	3	1	2	3	4	5
2015-12-16	405013	405	Suabari	1	Anulata Swain	52	1	2	1	1			2					4	2	1	1	1	2	3														7			2	1	2	1			4
2015-12-16	405014	405	Suabari	1	Sulei Pradhan	67	1	1	1	1	2	2			3			9	2	1	1	1		3														7			1	3	3	1	2	3	4	5
2015-12-16	405015	405	Suabari	1	Harasmani Pradhan	56	1	2	1	1			1					3	2	1	2		2	3														7			1	2	4	1	2	3	4	5
2015-12-16	405016	405	Suabari	1	Pratima Baliarsingh	56	1	2	1	1			2				1	5	4	3	1	1				5												7			1	2	2	1	2	3	4	5
2015-12-16	405017	405	Suabari	1	Laxmi Pradhan	62	1	2		1	1	1		2	3			8	7	2	1								8									7			1	1	2	1	2		4	5
2015-12-16	405018	405	Suabari	1	Lata Behera	52	2	2	1	1			2					4	2	1	1		2			5												7			1	3	3	1	2	3	4
2015-12-16	405019	405	Suabari	1	Arnapurna Behera	73	2	2		1	2	2	1		1			7	7	1	1								8									7			1	3	4	1	2	3	4	5
2015-12-16	405020	405	Suabari	1	Nishamani Pradhan	77	1	2		1	1	1	1	2				6	7	2	1								8									7			1	1	2	1	2	3	4
2015-12-16	405021	405	Suabari	1	Sailabala Behera	62	1	2	1	1			1	1				4	3	2	2		2	3														7			2	1	2		2	3
2015-12-16	405022	405	Suabari	1	Kuni Behera	48	1	2	1	1			1	3				6	2	2	1	1		3														7			2	1	2	1	2	3	4
2015-12-16	405101	405	Suabari	3	Asali Behera	60	3	2	1	1	1	2			4			9	1	1	2		2															7			1	2	1	1	2	3
2015-12-16	405102	405	Suabari	3	Sakhi Sahu	60	1	2		1	1	1	1	1				5	7	1	1								8									7			1	1	1	1	2	3
2015-12-16	405103	405	Suabari	3	Bhabeni Sahu	60	1	2	1	1	1	1		1	2			7	2	2	1	1	2															7			1	2	2	1	2	3
2015-12-16	405104	405	Suabari	3	Basanti Mohanty	64	1	2	1	1	2	2			3			9	3	3	1	1																7			1	2	2	1	2	3	4	5
2015-12-15	405105	405	Suabari	3	Rajani Rout	65	1	2	1	1			1	1				4	2	1	2							7										7			2	0	1	1		3
2015-12-16	405106	405	Suabari	3	Jhumpei Rout	40	1	2	1	1			1	1				4	2	1	2		2															7			2	1	1	1	2	3
2015-12-16	405107	405	Suabari	3	Hulash Rout	70	1	2		1	1	1			1			4	7	1	2								8									7			1	1	1	1		3
2015-12-16	405108	405	Suabari	3	China Behera	45	3	2	1	1	1	1	1	1	1			7	2	1	1	1				5												7			1	2	1	1	2	3	4
2015-12-16	405109	405	Suabari	3	Urmila Behera	50	3	2	1	1			3					5	3	1	1	1																7			1	2	1	1	2	3	4
2015-12-16	405110	405	Suabari	3	Kaikei Bagh	70	1	2	1	1	2	2	1	2	3			12	1	1	1							7										7			1	2	1		2	3	4
2015-12-16	405111	405	Suabari	3	Mina Parida	45	1	2	1	1			1	1				4	3	2	1	1				5												7			2	1	1	1	2	3	4
2015-12-16	405112	405	Suabari	3	Dhobi Parida	55	1	2	1	1	1	1	1		1			6	2	1	1	1																7			2	1	1	1	2	3
2015-12-16	405113	405	Suabari	3	Sabita Parida	50	1	2	1	1			1	2				5	3	2	1	1																7			2	1	1	1		3
2015-12-16	405114	405	Suabari	3	Lata Behera	65	3	2	1	1	3	3			3			11	2	2	1	1																7			1	4	2	1	2	3	4
2015-12-16	405115	405	Suabari	3	Laba Behera	70	3	2	1	1					2	1	1	6	1	1	1	1																7			1	2	1	1	2	3
2015-12-16	405116	405	Suabari	3	Bhanumati Behera	60	3	2	1	1			1	1				4	3	1	1	1	2															7			2	1	1			3
2015-12-16	405117	405	Suabari	3	Sajani Senapati	60	1	2	1	1	1	1			1			5	2	2	1	1																7			1	2	1	1	2	3	4
2015-12-16	405118	405	Suabari	3	Jamuna Swain	48	1	1			3	3	1	3	3			13	1	1	1	1	2															7			1	4	1	1	2	3	4
2015-12-16	405119	405	Suabari	3	Sita Pradhan	55	1	2	1	1	1	1			2			6	3	1	1	1	2															7			1	2	1	1	2	3	4
2015-12-16	405120	405	Suabari	3	Manju Behera	45	1	2	1	1			1		1			4	2	2	1	1																7			2	1	1	1	2	3
2015-12-16	405201	405	Suabari	2	Pramila Pradhan	55	1	2	1	1			2					4	3	2	1	1																7			2	1	1	1	2		4
2015-12-16	405202	405	Suabari	2	Bishnupriya Pradhan	38	1	2	1	1					2			4	3	3	1	1																7			2	1	1	1
2015-12-16	405203	405	Suabari	2	Mamata Pradhan	33	1	2		1	1	1			1			4	7	2	1								8									7			1	1	1	1	2		4	5
2015-12-16	405204	405	Suabari	2	Sakhi Parida	70	1	1		1	2	1			2			6	7	1	1								8									7			1	2	4	1	2	3	4
2015-12-16	405205	405	Suabari	2	Kanaklata Kodam Singh	55	99	2		1	1	1	1		1			5	3	3	1									99	Pension							7			2	1	1	1	2	3	4
2015-12-16	405206	405	Suabari	2	Pramila Swain	54	1	1	1	1	3	3	1		5			14	2	1	1	1																7			1	6		1	2	3	4	5
2015-12-16	405207	405	Suabari	2	Dulab Swain	45	1		1	1	1	1	2	1				7	2	2	1	1																7			1	2		1		3	4
2015-12-16	405208	405	Suabari	2	Annapurna Behera	55	1	2		1			1					2	7	2	1								8									7			1	1	1	1	2		4
2015-12-16	405209	405	Suabari	2	Runu Behera	35	1	2	1	1					2			4	3	3	1	1	2				6											7			2	1	1	1		3
2015-12-16	405210	405	Suabari	2	Netramani Behera	60	1	1	1	1	2	2	1		3			10	2	2	1							7										7			1	2	1	1	2	3	4	5
2015-12-16	405211	405	Suabari	2	Pramila Pradhan	52	1	2	1	1			1	1				4	3	3	1	1				5												7			1	1	2	1	2		4
2015-12-16	405212	405	Suabari	2	Sundari Pradhan	50	1	1	1	1	2	2		1	3			10	1	1	1	1																7			1	3	1	1	2	3	4	5
2015-12-17	406001	406	Janardanpur	1	Rajani Biswal	65	1	2	1	1	2	2	1		4			11	2	1	2		2	3														7			1	4	3	1	2	3	4
2015-12-17	406002	406	Janardanpur	1	Sulochana Jena	48	1	2	1	1			1	3			1	7	2	2	1	1	2	3														7			2	1	2	1	2	3
2015-12-17	406003	406	Janardanpur	1	Sajani Biswal	63	1	2	1	1	1	1			1			5	2	1	2			3														7			1	2	2	1	2	3
2015-12-17	406004	406	Janardanpur	1	Bengadei Baral	72	1	2	1	1	1	1			1			5	3	3	1	1		3														7			1	2	2	1		3
2015-12-17	406005	406	Janardanpur	1	Janaki Khatoi	48	1	2	1	1	1	1	1		1			6	2	2	2		2	3														7			1	3	2	1	2	3
2015-12-17	406006	406	Janardanpur	1	Kanak Baral	62	1	2	1	1							2	4	2	1	1	1	2															7			2	1	2			3
2015-12-17	406007	406	Janardanpur	1	Pramila Mishra	65	1	2		1	1	1		1				4	7	2	2								8										99	Pension	1		2	1	2
2015-12-17	406008	406	Janardanpur	1	Pranita Mishra	53	1	2	1	1	1	1	2	1	1		1	9	3	3	1	1																7			1	3	4	1	2	3		5
2015-12-17	406009	406	Janardanpur	1	Satyabhama Mishra	74	1	2		1	2	2	1					6	7	2	1								8										99	Pension	1	3	4	1	2	3	4	5
2015-12-17	406010	406	Janardanpur	1	Champa Sethy	68	3	2	1	1			1					3	1	1	2		2	3														7			1	2	2	1	2	3
2015-12-17	406011	406	Janardanpur	1	Marathi Das	76	3	2		1	1	1						3	7	1	1								8									7			1	1	3	1	2	3	4	5
2015-12-17	406012	406	Janardanpur	1	Sukanti Palei	40	3	2	1	1			1		1			4	2	1	2		2	3										3							2	2	2	1		3
2015-12-17	406013	406	Janardanpur	1	Kunti Palei	60	3	2		1			1	1				3	7	1	2								8									7			1	1	2	1		3
2015-12-17	406014	406	Janardanpur	1	Mara Palei	60	3	1	1	1	2	2	1		4			11	1	1	2		2	3														7			1	3	3	1	2	3
2015-12-17	406015	406	Janardanpur	1	Kuna Bhoi	42	3	2	1	1				1	3			6	2	2	2		2	3														7			2	1	1			3
2015-12-17	406101	406	Janardanpur	3	Kanaklata Biswal	53	1	2	1	1	1	1	1		1			6	2	1	2		2															7			1	3	1	1	2	3	4
2015-12-17	406102	406	Janardanpur	3	Sita Behera	48	2	2	1	1	1	1	1					5	3	1	2		2															7			1	3	1	1	2	3
2015-12-17	406103	406	Janardanpur	3	Gitanjali Behera	4	2	2		1	1	1	1	1				5	3	1	2			3														7			2	1	1	1		3
2015-12-17	406104	406	Janardanpur	3	Padmabati Muduli	60	2	2		1	3	3			6			13	7	2	1								8										99	Pension	1	3	2	1	2	3	4	5	6
2015-12-17	406105	406	Janardanpur	3	Buli Muduli	65	2	2		1	1	1			3			6	7	1	2															5					1	2	1	1		3	4
2015-12-17	406106	406	Janardanpur	3	Mina Mishra	58	1	2	1	1	1	1	2					6	3	3	1									99	Pension							7			1	2	2	1	2	3	4	5
2015-12-17	406107	406	Janardanpur	3	Subasi Mohapatra	60	1	2		1	1	1	1		1			5	7	2	1								8									7			1	1	1	1	2	3	4
2015-12-17	406108	406	Janardanpur	3	Binapani Mishra	55	1	2	1	1	1	1	1		1			6	3	3	1					5												7			2	1	1	1		3
2015-12-17	406109	406	Janardanpur	3	Rasmita Das	56	1	2	1	1			1				1	4	5	2	1				4													7			1	2	3	1	2	3	4	5	6
2015-12-17	406110	406	Janardanpur	3	Pramila Palei	60	3	2	1	1	1	1						4	1	1	2		2										2								1	3	1			3
2015-12-17	406111	406	Janardanpur	3	Kunimani Sethy	65	4	2	1	1	1	1		1	2			7	2	1	2							7											99	Laundry	1	1	1	1		3
2015-12-17	406112	406	Janardanpur	3	Bisi Sethy	70	4	2	1	1	1	1		1	2			7	1	1	2		2																99	Laundry	1	2	1			3
2015-12-17	406113	406	Janardanpur	3	Mani Behera	70	4	2		1	2	2	1		1			7	7	2	2								8									7			1	2	1		2	3
2015-12-17	406114	406	Janardanpur	3	Sundari Sethi	80	4	1	1	1	2	2	2		5			13	1	1	2			3															99	Laundry	1	2	1	1	2	3
2015-12-17	406116	406	Janardanpur	3	Gunjar Behera	65	4	2	1	1	1	1			1			5	2	1	2							7										7			1	1	1	1		3	4
2015-12-17	406201	406	Janardanpur	2	Suryamani Muduli	46	2	2	1	1	1	1	1					5	3	3	2				4														99	Pattery	2	2	2		2	3
2015-12-17	406202	406	Janardanpur	2	Kumudini Muduli	35	2	2	1	1			1	1				4	3	3	2		2																		2	1	1	1	2	3
2015-12-17	406203	406	Janardanpur	2	Muli Muduli	60	2	2		1	1	1			2			5	7	1	1								8									7			1	1	1	1	2	3	4
2015-12-17	406204	406	Janardanpur	2	Champa Behera	60	3	2	1	1			1	1				4	2	1	2		2	3										3							2	2	1			3
2015-12-17	406205	406	Janardanpur	2	Gurei Behera	50	3	2	1	1			1	1	2	1		7	1	1	2		2	3										3							1	3	1	1
2015-12-17	406206	406	Janardanpur	2	Uttama Behera	45	3	1	1	1	3	1	2	1	2	1		12	5	3	1	1	2							99	Pension							7			1	2		1	2	3
2015-12-17	406207	406	Janardanpur	2	Kuni Palei	30	3	2	1	1					2		1	5	3	2	1	1		3														7			2	1	1	1	2	3
2015-12-21	408001	408	Solana	1	Rajani Swain	63	1	2			2	2		1	2			8	7	1	1								8									7			1	2	2	1	2	3
2015-12-21	408002	408	Solana	1	Haras Pradhan	57	1	2	1	1			3	1				6	2	2	1	1	2	3								1		3							1	4	3	1	2	3	4
2015-12-21	408003	408	Solana	1	Jhumpi Pradhan	57	1	2	1	1				1				3	3	2	1	1		3														7			2		2	1		3
2015-12-21	408004	408	Solana	1	Sulekha Jena	40	1	2	1	1			2		1		1	6	3	2	1	1																7			1	2	2	1	2	3	4
2015-12-21	408005	408	Solana	1	Santilata Jena	50	1	2	1	1			1	1				4	2	1	2			3														7			2	1	2	1	2	3
2015-12-21	408006	408	Solana	1	Minati Jena	61	1	2	1	1								2	5	2	1	1										1									2	2	1	1		3
2015-12-21	408007	408	Solana	1	Saraswati Dash	65	1	2	1	1	1	1			2			6	1	2	1	1																7			1	2	3	1	2	3
2015-12-21	408008	408	Solana	1	Bhasi Swain	62	1		1	1	1	1	1	1	2			8	2	1	1	1		3								1									1	4	2	1		3
2015-12-21	408009	408	Solana	1	Chandamani Swain	59	1	2	1	1	1	1	1		1			6	2	2	1	1	2	3														7			1	3	3	1	2	3	4
2015-12-21	408010	408	Solana	1	Sanjukta Badhei	45	1	2	1	1				3			2	7	2	2	1			3														7			2	1	1	1		3
2015-12-21	408011	408	Solana	1	Mina Sahoo	44	2	2	1	1			2					4	2	2	1	1				5												7			1	2	3	1	2	3
2015-12-21	408012	408	Solana	1	Ahalya Badhei	52	1	2	1	1			1				1	4	3	3	1	1	2	3														7			1	2	2	1	2	3
2015-12-21	408013	408	Solana	1	Satyabhama Badhei	45	1	2	1	1			1	1				4	3	3	1	1	2	3														7			2	1	1	1		3
2015-12-21	408014	408	Solana	1	Saraswati Maharana	42	2	2	1	1				4			2	6	3	3	1			3														7			2	1	2	1	2	3	4
2015-12-21	408015	408	Solana	1	Sulochana Swain	55	1	2	1	1				1	1			4	3	1	1	1	2	3														7			2	1	2	1	2	3
2015-12-21	408016	408	Solana	1	Tikina Swain	55	1	2	1	1	1	1			1		2	7	2	1	1	1		3														7			1	2	2	1	2	3	4
2015-12-21	408017	408	Solana	1	Pramila Swain	45	1	2	1	1			1	1				4	1	2	1	1	2	3														7			2	1	2	1		3
2015-12-21	408018	408	Solana	1	Gurei Barik	45	2	2		1			1	1				3	7	1	1								8			1		3							1	2	1			3
2015-12-21	408019	408	Solana	1	Rina Maharana	35	2	2	1	1				1			1	4	3	3	1			3														7			2	1	2	1		3
2015-12-21	408020	408	Solana	1	Mamata Maharana	36	2	2	1	1					2		1	5	3	4	1			3														7			2	1	2	1		3
2015-12-21	408301	408	Solana	4	Niashi Biswal	58	1	2	1	1			1					3	2	1	1	1																7			1	2	1		2
2015-12-21	408302	408	Solana	4	Lata Biswal	45	1	2	1	1				1			2	5	3	2	1	1																7			1	2	2	1	2	3
2015-12-21	408303	408	Solana	4	Purnima Biswal	30	1	2	1	1					2			4	3	3	1			3														7			2	1	1	1		3
2015-12-21	408304	408	Solana	4	Sukanti Biswal	30	1	2	1	1					2			4	2	1	1			3														7			2	1	1			3
2015-12-21	408305	408	Solana	4	Bishika Biswal	25	1	2	1	1					1			3	2	3	1			3														7			2	1	1
2015-12-21	408306	408	Solana	4	Ritarani Upadhaya	42	1	2	1	1			1					3	4	3	1					5												7			2	1	2	1	2		4
2015-12-21	408307	408	Solana	4	Hema Swain	35	1	2	1	1			1	1			2	6	3	1	1	1																7			2	1	1	1		3
2015-12-21	408308	408	Solana	4	Haluri Swain	46	1	2	1	1			2					4	3	1	1	1																7			2	1	1	1	2
2015-12-21	408309	408	Solana	4	Latamani Sahoo	64	1	2	1	1	2	2			5			11	1	1	2	1		3														7			1	3	1	1	2	3	4
2015-12-21	408310	408	Solana	4	Arnapurna Sahoo	50	1	2	1	1	1		2		2			7	3	3	1	1																7			1	2	2	1	2	3
2015-12-21	408311	408	Solana	4	Surama Baral	50	1	2		1	1	1	1		2		1	7	7	1	1								8						4						1	2	1	1	2	3
2015-12-21	408312	408	Solana	4	Sukanti Barik	60	2	2	1	1			1					3	2	1	2			3														7			2	1	1			3
2015-12-21	408313	408	Solana	4	Sasmita Barik	30	2	2	1	1					2			4	3	3	1					5												7			2	1	1	1	2	3	4
2015-12-21	408314	408	Solana	4	Sumitra Barik	28	2	2	1	1					2			4	3	3	1					5												7			2	1	1	1	2	3
2015-12-21	408315	408	Solana	4	Taramani Barik	60	2	2	1	1	1	1			2			6	2	2	1	1																7			1	1	1
2015-12-21	408316	408	Solana	4	Janaki Barik	39	2	2	1	1			2					4	2	2	2					5												7			2	1	1	1	2	3	4
2015-12-21	408317	408	Solana	4	Basanti Barik	50	2	2	1	1				2				4	2	1	1	1		3														7			2	1	1
2015-12-21	408318	408	Solana	4	Ramamani Barik	50	2	2	1	1				1	2		2	7	3	3	1	1		3														7			2	1	1	1	2	3
2015-12-21	408319	408	Solana	4	Sanjukta Maharana	40	2	2	1	1			2					4	3	2	1	1		3														7			2	1	1			3
2015-12-21	408320	408	Solana	4	Tikina Badhei	42	2		1	1	1	1	2		1		1	8	3	1	1	1		3														7			1	3	4	1	2	3	4	5
2015-12-30	409001	409	Dakhinasahi	1	Radhamani Jena	40	1	2	1	1			1	1	2		1	7	3	1	1	1		3														7			2	1	1	1	2	3
2015-12-30	409002	409	Dakhinasahi	1	Japani Jena	45	1	2	1	1			2				1	5	3	2	1	1		3														7			2	1	1		2	3
2015-12-30	409003	409	Dakhinasahi	1	Mina Behera	50	2	2	1	1								2	2	1	1	1		3														7			2	1	1			3
2015-12-30	409004	409	Dakhinasahi	1	Sina Behera	38	2	2	1	1					2			4	2	1	1	1		3														7			2	1	1		2	3
2015-12-30	409005	409	Dakhinasahi	1	Ranga Jena	66	1	2	1	1	1	1	2					6	2	2	1	1	2	3														7			1	2	2	1	2	3
2015-12-30	409006	409	Dakhinasahi	1	Haras Behera	51	2	2		1	1	1	1					4	7	2	1								8									7			1	2	2	1	2	3	4
2015-12-30	409007	409	Dakhinasahi	1	Kuni Jena	35	1	2	1	1					1			3	3	3	1	1		3														7			2	1	1	1	2	3
2015-12-30	409008	409	Dakhinasahi	1	Harasamani Behera	62	2	2		1	2	2	1		4			10	7	1	1								8									7			1	3	2	1	2	3
2015-12-30	409009	409	Dakhinasahi	1	Pratima Swain	31	1	2	1	1					2			4	4	3	1	1		3											4						2	2	2	1		3
2015-12-30	409010	409	Dakhinasahi	1	Pramila Swain		1	2	1	1	1	1			1			5	2	1	1	1		3														7			1	2	2	1	2	3
2015-12-30	409011	409	Dakhinasahi	1	Sita Jena	60	1	2	1	1	1	1	1		2			7	2	1	1	1	2	3														7			1	3	2	1	2	3
2015-12-30	409012	409	Dakhinasahi	1	Misini Swain	65	1	2	1	1	2	2			6			12	2	1	1	1	2	3														7			1	3	2	1	2	3
2015-12-30	409013	409	Dakhinasahi	1	Sabitri Swain	55	1	2	1	1			1	1				4	2	2	1	1		3														7			1	2	1			3
2015-12-30	409014	409	Dakhinasahi	1	Bhabeni Swain	40	1	2	1	1			1	2			1	5	1	2	1	1	2															7			2	1	3	1	2	3
2015-12-30	409015	409	Dakhinasahi	1	Dhani Behera	48	3	2	1	1	1	1						4	2	1	2		2	3										3							1	3	1	1		3
2015-12-30	409016	409	Dakhinasahi	1	Santilata Khuntia	46	1	2	1	1			2					4	2	3	1	1	2	3														7			1	2	3	1	2	3
2015-12-30	409017	409	Dakhinasahi	1	Ranga Behera	55	2	2	1	1	3	3			2			10	3	1	1				4													7			1	4	4	1	2	3
2015-12-30	409018	409	Dakhinasahi	1	Anjana Khuntia	44	1	2	1	1				2				4	3	3	1	1	2	3														7			2	1	1			3
2015-12-30	409301	409	Dakhinasahi	4	Sashi Singh	60	1	2	1	1					1	1	1	5	2	1	1							7										7			1	1	2	1	2	3
2015-12-30	409302	409	Dakhinasahi	4	Ketaki Singh	51	1	2	1	1	1	1	1		1			6	2	1	1	1	2															7			1	2	2	1	2	3
2015-12-30	409303	409	Dakhinasahi	4	Narakhari Jena	56	1	2	1	1	1	1	1		3		1	9	2	1	1	1		3														7			1	1	2	1	2	3
2015-12-30	409304	409	Dakhinasahi	4	Para Jena	60	1	2	1	1	2	2	1	1	1			9	2	2	1	1																7			1	3	2	1		3
2015-12-30	409305	409	Dakhinasahi	4	Saila Behera	38	3	2		1			2					3	7	1	2								8									7			1	1	1			3
2015-12-30	409306	409	Dakhinasahi	4	Jayanti Behera	35	3	2	1	1			1		1			4	4	3	1	1				5												7			2	1	2	1		3
2015-12-30	409307	409	Dakhinasahi	4	Pramila Swain	50	1	2	1	1			2				2	6	2	2	1				4													7			1	2	4	1	2	3	4
2015-12-30	409308	409	Dakhinasahi	4	Ramamani Swain	48	1	2	1	1			1				1	4	2	3	1	1																7			1	2	3	1	2	3
2015-12-30	409309	409	Dakhinasahi	4	Ashamani Swain	61	1	2	1	1	2	2			3			9	2	1	1	1																7			1	3	2	1	2	3	4
2015-12-30	409310	409	Dakhinasahi	4	Binodini Swain	40	1	2	1	1	1	1	2		2		1	9	3	2	1	1																7			1	2	1	1	2	3
2015-12-30	409311	409	Dakhinasahi	4	Sashi Behera	60	3	2		1	2	2			3		1	9	7	2	1								8									7			1	2	2	1	2	3	4	5
2015-12-30	409312	409	Dakhinasahi	4	Gitanjali Swain	41	1	2	1	1					2			4	4	3	1	1																7			2	1	1			3
2015-12-30	409313	409	Dakhinasahi	4	Hulari Swain	55	1	2	1	1			1					3	2	2	1	1		3														7			2	1	1			3
2015-12-30	409314	409	Dakhinasahi	4	Pratima Swain	36	1	2	1	1			1				1	4	3	3	1	1																7			1	1	1		2	3
2015-12-30	409315	409	Dakhinasahi	4	Sanju Behera	52	3	2	1	1	2	2			2			8	1	1	2			3										3							1	3	1	1		3
2015-12-30	409316	409	Dakhinasahi	4	Duti Behera	45	3	2	1	1				1	2			5	2	1	2			3										3							2	2	1			3
2015-12-30	409317	409	Dakhinasahi	4	Kokila Khuntia	81	1	2		1	1	1			2			5	7	1	1								8									7			1	1	2	1		3	4
2015-12-30	409318	409	Dakhinasahi	4	Sabitri Barik	55	2	2	1	1			1					3	3	2	1	1																7			1	2	1	1	2	3
2015-12-15	410001	410	Kairi	1	Jhumpi Biswal	65	1	2	1	1	2	2	1	1	2			10	1	2	2		2															7			1	3	2	1	2	3	4	5
2015-12-15	410002	410	Kairi	1	Rajanigandha Barik	54	2	2		1	1	1	1		1			5	7	2	1								8										99	Pension	1	1	3	1	2		4	5
2015-12-15	410003	410	Kairi	1	Laxmi Jena	53	1	1	1	1			2					4	2	1	2			3														7			1	3	2	1	2	3			6
2015-12-15	410004	410	Kairi	1	Sulochana Jena	60	1	2	1	1	1	1			2			6	4	2	1								8	99	Pension							7			1	2	2	1	2	3	4	5
2015-12-15	410005	410	Kairi	1	Kanak Chhatoi	45	1	2	1	1			1	1				4	3	2	1			3															99	Cow's milk	2	2	1	1	2	3
2015-12-15	410006	410	Kairi	1	Rambha Swain	68	1	2	1	1	1	1	1		2			7	1	2	1							7										7			1	2	2	1	2		4
2015-12-15	410007	410	Kairi	1	Hema Jena	57	1	2	1	1	1	1	1	1	1			7	3	2	1	1	2															7			1	3	2	1	2		4	5
2015-12-15	410008	410	Kairi	1	Asamani Nayak	70	1	1		1	2	2	2		4	1		12	7	1	1								8									7			1	4	3	1	2	3	4	5
2015-12-15	410009	410	Kairi	1	Manorama Nayak	48	1	1	1	1			1	1				4	3	3	1	1		3														7			1	2	2	1	2	3	4	5
2015-12-15	410010	410	Kairi	1	Sarojini Nayak	65	1	1	1	1	2	2	1		2			9	2	2	1							7										7			1	2	2	1	2	3	4	5
2015-12-15	410011	410	Kairi	1	Sita Nayak	50	1	1	1	1	2	1	1	2	1			9	2	2	1	1		3														7			1	3	3	1	2	3	4
2015-12-15	410012	410	Kairi	1	Jema Nayak	57	3	2		1	1	1				1		4	7	1	1			3														7			1	2	1	1		3
2015-12-15	410013	410	Kairi	1	Rama Nayak	56	3	2		1			1					2	7	1	2								8									7			1	1	1	1		3
2015-12-15	410014	410	Kairi	1	Jamuna Nayak	45	3	2	1	1					1			3	2	1	1	1		3										3							2	2	1	1	2	3
2015-12-15	410015	410	Kairi	1	Runi Nayak	56	3	2	1	1			2	1				5	2	2	2		2	3										3							2	2	2	1		3
2015-12-15	410016	410	Kairi	1	Basanti Barik	52	2	2	1	1	3	3			2			10	3	2	1									99	Pension							7			1	5	3	1	2	3	4	5	6
2015-12-15	410017	410	Kairi	1	Kuntala Barik	59	2	2		1	2	2	2	2	2			11	7	2	1								8										99	Pension	1	3	3	1	2	3	4		6
2015-12-15	410018	410	Kairi	1	Sabitri Barik	70	2		1	1	2	2	3	1	1			11	1	1								7										7			1	3	3	1	2	3	4
2015-12-15	410019	410	Kairi	1	Urmila Barik	51	2	2		1			2					3	7	3	1								8										99	Pension	1	3	2	1	2	3	4	5
2015-12-15	410020	410	Kairi	1	Harasmani Barik	54	2	2	1	1				4				6	3	2	1									99	Pension							7			2	1	2	1	2	3	4
2015-12-15	410101	410	Kairi	3	Pravasini	47	2	2	1	1			1	3				6	2	3	1	1				5													99	Anganwadi Helper	2	2	1	1	2	3
2015-12-15	410102	410	Kairi	3	Rama Mallick	55	3	2	1	1	1	1						4	3	1	1									99	Retired Govt. service							7			1	2	3	1	2	3	4	5
2015-12-15	410103	410	Kairi	3	Sarojini Mallick	50	3	2	1	1			1					3	4	3	1				4													7			2	1	2	1	2	3		5
2015-12-15	410104	410	Kairi	3	Khulana Mallick	70	3	2		1	1	2	1	1	1			7	7	1	1								8										99	Pension	1	1	2	1	2	3
2015-12-15	410105	410	Kairi	3	Basanti Mallick	45	3	2	1	1			2					4	3	2	1					5				99	Contractor							7			2	1	2	1	2	3	4
2015-12-15	410106	410	Kairi	3	Guni Mallick	70	3	2		1	2	2		1				6	7	1	1								8									7			1	2	2	1		3
2015-12-15	410107	410	Kairi	3	Bari Mallick	71	3	2		1	1	1	2	1				6	7	1	1								8									7			1	1	2	1	2		4	5	6
2015-12-15	410108	410	Kairi	3	Nayan Mallick	55	3	2	1	1								2	2	2	2			3														7			2	1	1			3
2015-12-15	410109	410	Kairi	3	Sakhi Pradhan	60	2	2	1	1	1	1	1	2				7	2	1	1	1																7			1	1	3	1	2	3	4
2015-12-15	410110	410	Kairi	3	Sanjukta Pradhan	50	2	2	1	1	1	1			1			5	2	1	1	1																7			1	1	2	1	2	3	4	5
2015-12-15	410111	410	Kairi	3	Rani Sahu	65	2	2		1	1	1			2			5	7	1	2								8									7			1	2	2	1	2	3	4	5
2015-12-15	410112	410	Kairi	3	Manorama Sahu	50	1	2	1	1	2	2		1	3			10	3	3	1						6											7			1	3	2	1	2	3	4	5
2015-12-15	410113	410	Kairi	3	Anjali Sahu	40	2	2		1	1	1	2		1			6	3	2	1				4													7			2	1	3	1	2	3	4
2015-12-15	410114	410	Kairi	3	Puspalata Sahu	50	1	1			2	2	2	2				8	3	1	1									99	Pension							7			1	2	2	1	2	3	4	5
2015-12-15	410115	410	Kairi	3	Champa Sahu	50	1	2	1	1			2					4	3	2	1	1																7			1	2	1	1	2	3	4
2015-12-15	410116	410	Kairi	3	Pramila Sahu	62	1	2	1	1	1	2	2					7	3	2	1	1																7			1	3	4	1	2	3	4
2015-12-15	410117	410	Kairi	3	Tuni Sethy	50	3	2	1	1			1					3	1	1	2			3														7			2	1	1	1		3	4
2015-12-15	410118	410	Kairi	3	Renu Sethy	45	4	2	1	1			1					3	2	2	2							7										7			1	1	2	1	2	3
2015-12-15	410119	410	Kairi	3	Kuntala Sahoo	50	2	2		1	1	1	1					4	3	2	1	1	2															7			1	2	1			3	4
2015-12-15	410120	410	Kairi	3	Malati Sahu	68	2	2		1	1	1	2					5	7	1	2								8									7			1	1	1	1	2	3	4
2015-12-15	410201	410	Kairi	2	Sombari Behera/Bhoi	60	3	1	1	1	1	1	1	1	2			8	2	1	1		2	3														7			1	2	1	1		3
2015-12-15	410202	410	Kairi	2	Geetanjali Mallik	35	3	2	1	1					2			4	3	3	1									99	Driver							7			2	1	1	1	2	3			6
2015-12-15	410203	410	Kairi	2	Labanyabati Barik	50	2		1	1	2	2	2	1	1			10	3	2	2				4													7			1	2	3	1	2	3	4	5
2015-12-15	410204	410	Kairi	2	Sabita Dash	43	1	2	1	1			1	1				4	3	3	1	1																7			2	1	1	1	2	3
2015-12-15	410205	410	Kairi	2	Minu Barik	50	2	2	1	1	1	1		1	1			6	3	2	2			3														7			1	2	1	1	2	3	4
2015-12-15	410206	410	Kairi	2	Bharati Ojha	65	2	2		1	1	1	2					5	3	2	2				4													7			1	3	3	1	2	3	4	5
2015-12-15	410207	410	Kairi	2	Ranjulata Ojha	35	2	2	1	1					2			4	2	2	2									99	Carpenter							7			2	1	1	1	2	3
2015-12-15	410208	410	Kairi	2	Manjulata Ojha	38	2	2	1	1			2	1				5	2	2	2									99	Corporater							7			2	1	2	1	2	3	4
2015-12-15	410209	410	Kairi	2	Netamani Ojha	60	2		1	1	1	1	1	3				8	1	1	2							7										7			1	1	1	1	2	3
2015-12-15	410210	410	Kairi	2	Tulasi Ojha	50	2		1	1	1			1	1	1		6	2	1	2			3															99	ANW helper UP Sahoo	1	3	1	1		3
2015-12-15	410211	410	Kairi	2	Minati Ojha	52	2	2	1	1			2	1			1	6	3	2	2		2	3												5					1	2	2	1	2	3
2015-12-15	410212	410	Kairi	2	Arnapurna Padhi	45	1	1		1	3	3	1	1	3			12	7	3	1								8									7			1	3	3	1	2	3	4	5
2015-12-15	410213	410	Kairi	2	Hini Swain	50	2		1	1	1	1	1		1			6	3	1	1							7										7			1	2	1	1	2	3	4
2015-12-15	410214	410	Kairi	2	Sailabala Swain	55	2			1	3	3			4			11	7	1	2								8									7			1	3	2	1	2	3
2016-01-08	411301	411	Bhoigun	4	Sundari Barik	65	2	2	1	1	1	1						4	1	1	2		2															7			1	2	1	1	2	3
2016-01-08	411302	411	Bhoigun	4	Subasi Parida	47	2	2	1	1	1	1		1	2			7	2	1	1		2	3														7			1	1	1	1	2	3
2016-01-08	411303	411	Bhoigun	4	Satyabhama Pradhan	45	1	2	1	1	1	1			3			7	2	3	1		2	3														7			1	1	2	1	2	3	4
2016-01-08	411304	411	Bhoigun	4	Labanya Pradhan	48	1	2	1	1				1				3	1	1	2		2	3														7			2	1	1	1	2	3
2016-01-08	411305	411	Bhoigun	4	Maina Pradhan	38	1	2	1	1				1				3	3	1	2		2	3														7			2	1	1	1	2	3
2016-01-08	411306	411	Bhoigun	4	Pramila Panda	51	1	2	1	1	2	2	1		2			9	3	2	1	1																7			1	2	2	1	2	3	4
2016-01-08	411307	411	Bhoigun	4	Lalita Behera	57	3	2	1	1	3	3			3			12	3	1	2			3										3							1	3	2	1	2	3
2016-01-08	411308	411	Bhoigun	4	Lata Behera	46	3	2	1	1			2		1			5	2	1	2		2	3										3							1	2	2	1	2	3	4
2016-01-08	411309	411	Bhoigun	4	Pramila Behera	49	3	2	1	1	2	2			3			9	1	1	2		2	3										3							1	2	1	1		3
2016-01-08	411310	411	Bhoigun	4	Ramamani Barik	65	2	2	1	1				1				3	3	1	1				4													7			2	1	1	1	2	3
2016-02-09	411311	411	Bhoigun	4	Ashalata Barik	55	2	2	1	1			1	2			1	6	4	2	1				4													7			1	1	3	1	2	3	4
2016-01-09	411312	411	Bhoigun	4	Kamini Barik	42	2	2	1	1	1		1	2	1			7	2	1	2			3														7			2	1	1	1		3
2016-01-09	411313	411	Bhoigun	4	Basanti Barik	50	2	2	1	1			2	1				5	3	3	1					5												7			1	3	4	1	2	3	4
2016-01-09	411314	411	Bhoigun	4	Manorama Senapati	55	1	2	1	1				2				4	6	6	1				4										4						2	2	4	1	2	3	4	5	6
2016-01-09	411315	411	Bhoigun	4	Hullash Pradhan	59	1	2	1	1	1	1			3		1	8	1	1	2			3														7			1	2	1	1	2	3
2016-01-09	411316	411	Bhoigun	4	Guni pati	70	1	2	1	1	1	1	1					5	3	2	1	1																7			1	2	2	1	2	3	4
2016-01-09	411317	411	Bhoigun	4	Rina Barik	35	2	2	1	1					3			5	2	3	2			3														7			2	1	1	1	2	3
2016-01-09	411318	411	Bhoigun	4	Sabita Barik	35	2	2	1	1					3			5	2	3	1	1																7			2	1	1			3
2016-01-09	411319	411	Bhoigun	4	Gitarani Mishra	60	1	2	1	1			1					3	3	3	1	1														5					1	3	2	1	2		4
2016-01-09	411320	411	Bhoigun	4	Dula Pradhan	35	1	2	1	1					2			4	2	2	2				4													7			2	1	2	1	2	3
2016-01-09	411321	411	Bhoigun	4	Sundari Pradhan	48	1	2	1	1	1	1			1			5	1	1	2		2										2								1	3	2	1	2	3	4
2016-01-09	411322	411	Bhoigun	4	Pramila Panda	54	1	2	1	1	2	2	1		2			7	2	2	1	1																7			1	3	2	1	2	3	4	5
2016-01-09	411323	411	Bhoigun	4	Manorama Panda	62	1	2		1							2	3	7	3	1								8			1			4						2	1	2	1	2	3		5
2016-01-09	411324	411	Bhoigun	4	Sukanti Behera	45	3	2	1	1		1	1					4	2	2	2		2	3														7			2	1	1	1	2	3
2016-01-09	411325	411	Bhoigun	4	Santi Behera	43	3	2	1	1	1	1			1			5	2	1	2		2	3										3							1	2	1	1	2	3
2016-01-09	411326	411	Bhoigun	4	Champa Behera	48	3	2	1	1			1					3	2	1	1	1		3										3							1	2	1	1		3
2016-01-09	411327	411	Bhoigun	4	Tanu Behera	46	3	2	1	1	2	2			2			8	2	1	1	1		3										3							1	3	2	1	2	3
2015-12-24	621001	621	Sagada	1	Kunibala Behera	1	2	2	1	1	1	1	2	1	1			8	1	1	2							7				1									1	1	2	1		3
2015-12-24	621002	621	Sagada	1	Renubala Behera	48	2	2		1			1	1			1	4	7	2	1								8			1	2								2	1	2	1		3
2015-12-24	621003	621	Sagada	1	Santilata Panda	45	1	2	1	1			3					5	3	3	1	1																7			2	1	2	1	2	3	4
2015-12-24	621004	621	Sagada	1	Mamata Panda	42	1	2	1	1				1	1			4	2	3	2									99	Priest							7			2	1	2	1	2	3
2015-12-24	621005	621	Sagada	1	Minakhi Panda	46	1	2	1	1			1					3	3	3	1									99	Priest							7			1	2	2	1	2	3	4
2015-12-24	621006	621	Sagada	1	Kabita Nayak	48	1	2	1	1			1				1	4	6	3	1				4													7			1	2	4	1	2	3	4	5
2015-12-24	621007	621	Sagada	1	Urmila Panda	64	1	1	1	1	4	4	2		3			15	3	2	1	1																7			1	5	4	1	2	3	4	5
2015-12-24	621008	621	Sagada	1	Manorama Dikshit	53	1	2	1	1			2					4	6	3	1				4										4						1	4	4	1	2	3	4	5
2015-12-24	621009	621	Sagada	1	Kuni Maharana	45	2	2	1	1				3				5	3	2	2			3														7			2	1	1	1		3
2015-12-24	621010	621	Sagada	1	Sulochana Sahu	57	2	2	1	1					1	1		4	1	2	2					5												7			2	1	1	1	2	3
2015-12-24	621011	621	Sagada	1	Rama Barik	70	2	2		1	1	1	1	1	1			6	7	2	1								8									7			1	2	4	1	2	3	4	5
2015-12-24	621012	621	Sagada	1	Sarojini Pradhan	56	1	2	1	1	1	1		1	1			7	2	1	1	1		3														7			1	2	2	1	2	3
2015-12-24	621013	621	Sagada	1	Bimala Ojha	65	2	2	1	1	1	1	1		2			7	2	2	1	1		3														7			1	3	2	1	2	3
2015-12-24	621014	621	Sagada	1	Sasmita Sethy	35	3	2	1	1				1	2			5	3	3	2		2	3														7			2	1	1	1	2
2015-12-24	621015	621	Sagada	1	Susama Senapati	42	1	2	1	1	1	1	1		3			8	3	3	1	1																7			1	2	4	1	2	3	4
2015-12-24	621016	621	Sagada	1	Sumitra Pratihari	32	1	2	1	1			1		1		1	5	3	3	1	1				5												7			2	1	2	1	2	3	4
2015-12-24	621017	621	Sagada	1	Debaki Pradhan	50	1	2	1	1			2	1				5	2	1	1	1																7			1	2	2	1	2	3
2015-12-24	621101	621	Sagada	3	Laxmipriya Behera	80	2	2	1	1	2	2	1	1	2			10	2	1	1	1																7			1	3	1	1	2	3
2015-12-24	621102	621	Sagada	3	Netramani Panda	80	1	2		1	1	1	2					5	7	2	1								8									7			1	1	1	1	2	3
2015-12-24	621103	621	Sagada	3	Sasmita Mishra	42	1	2		1	1	1	1	1				5	3	3	1	1																7			2	1	1	1		3
2015-12-24	621104	621	Sagada	3	Sumitra Behuria	38	1	2	1	1				2				4	3	3	1									99	Electrician							7			2	1	1	1	2	3	4
2015-12-24	621105	621	Sagada	3	Pravasini Mohanty	48	1	2	1	1			1	1				4	3	3	1	1																7			2	1	1	1
2015-12-24	621106	621	Sagada	3	Swarnaprava Nayak	68	1	2		1	1	1			1		1	5	7	2	1								8									7			1	1	2	1	2	3	4
2015-12-24	621107	621	Sagada	3	Namita Moharana	39	1	2	1	1				3	1			6	3	3	1			3														7			2	1	2	1	2	3
2015-12-24	621108	621	Sagada	3	Padmabati Moharana	70	2	2	1	1	1	1			1			5	2	1	1			3														7			1	2	1	1	2	3
2015-12-24	621109	621	Sagada	3	Haramani Moharana	70	2	2	1	1	1	1			2			6	2	2	1	1																7			1	2	2	1	2	3
2015-12-24	621110	621	Sagada	3	Urmila Barik	40	2	2	1	1				2				4	3	3	1	1																7			2	1	1
2015-12-24	621111	621	Sagada	3	Rasmita Barik	36	2	2	1	1					2			4	3	3	1			3														7			2	1	1	1		3
2015-12-24	621112	621	Sagada	3	Bhabani Pradhan	46	1	2	1	1	1	1	1					5	3	3	1	1																7			1	2	1	1	2	3
2015-12-24	621113	621	Sagada	3	Phula Sethi	55	3	2	1	1	1	1			4			8	1	1	2							7										7			1	1	1	1	2
2015-12-24	621114	621	Sagada	3	Minati Pratihari	33	1	2	1	1					2			4	3	3	1	1								99	Electri weiring							7			2	1	1	1	2	3
2015-12-24	621115	621	Sagada	3	Ashalata Pratihari	53	1	2	1	1			1	1				4	3	2	1	1																7			2	1	1	1		3
2015-12-24	621116	621	Sagada	3	Nilamani Routray	48	1	2	1	1			2	2				6	3	3	1	1	2															7			1	2	1	1	2
2015-12-24	621117	621	Sagada	3	Minati Pradhan	45	1	2		1	1	1	1					4	3	2	1	1																7			1	2	1	1		3
2015-12-24	621301	621	Sagada	4	Sabita Behera	32	2	2	1	1					2			4	2	3	2	1		3														7			2	1	2	1		3
2015-12-24	621302	621	Sagada	4	Manorama Behera	42	2	2	1	1			1					3	1	1	2		2	3														7			2	1	2	1	2	3
2015-12-24	621303	621	Sagada	4	Sashi Mohanty	70	1	2		1							1	2	7	1	2								8										99	Pension	2	1	1
2015-12-24	621304	621	Sagada	4	Rina Panda	45	1	2	1	1					2			4	3	3	2			3						99	Priest							7			1	1	1	1	2	3
2015-12-24	621305	621	Sagada	4	Mamata Panda	44	1	2	1	1			2					4	3	3	1		2								Priest							7			1	1	1	1		3
2015-12-24	621306	621	Sagada	4	Sunita Panda	44	1	2	1	1			1	1				4	3	3	1	1								99	Priest							7			2	1	1	1		3
2015-12-24	621307	621	Sagada	4	Bengalata Mishra	86	1	2		1	1	1						3	7	1	1								8									7			1	1	2	1	2	3	4
2015-12-24	621308	621	Sagada	4	Basanti Nayak	60	2	2	1	1	1	1	2	1	1			8	2	1	1	1																7			1	2	2	1
2015-12-24	621309	621	Sagada	30	Kabita Senapati	30	1	1	1	1	1	1	1		4		1	10	3	3	1	1		3														7			1	3	2	1	2	3	4
2015-12-24	621310	621	Sagada	4	Bandana Nayak	47	2	2	1	1			2					4	4	3	1	1		3														7			2	1	1	1	2	3
2015-12-24	621311	621	Sagada	4	Aparna Nayak	34	2	2	1	1					2		1	5	5	4	1	1				5												7			2	1	2	1	2	3	4
2015-12-24	621312	621	Sagada	4	Sanjukta Nayak	35	2	2	1	1					2		1	5	4	3	1			3														7			2	1	1	1	2	3
2015-12-24	621313	621	Sagada	4	Gauri Nayak	50	2	2	1	1				1	1			4	3	1	2					5												7			2	1	2	1		3
2015-12-24	621314	621	Sagada	4	Joshnarani Nayak	58	2	2		1			1	1				3	7	3	1								8			1							99	Pension	1	1	1	1		3
2015-12-24	621315	621	Sagada	4	Sarojini Nayak	42	2	2	1	1			2					4	4	3	1	1																7			2	1	1	1	2	3
2015-12-24	621316	621	Sagada	4	Sulochana Sethy	35	3	2	1	1			2		1		1	6	3	3	2	1		3														7			2	1	2	1	2	3
2015-12-24	621317	621	Sagada	4	Snehalata Sethy	42	3	2	1	1			1					3	3	4	1				4										4						2	2	2	1	2	3	4	5
2015-12-24	621318	621	Sagada	4	Kuntala Sethy	48	3	2	1	1	1	1	1		1			6	2	2	2		2	3										3							1	3	2	1		3
2015-12-24	621319	621	Sagada	4	Khetramani Senapati		2	2		1	1	1			2			5	7	3	1								8			1									1	1	2	1	2	3	4
2015-12-24	621320	621	Sagada	4	Kalpana Senapati	27	2	2	1	1							1	3	3	3	1	1																7			2	1	1			3
2015-12-31	624001	624	Baliasasan	1	Gurubari Mallik	62	3	2		1	1	1	2	1				6	7	2	1								8									7			1	2	2	1	2	3
2015-12-31	624002	624	Baliasasan	1	Chandramani Mallik	65	3	2	1	1	2	2	3		4			13	2	2	1							7										7			1	5	4	1	2	3	4
2015-12-31	624003	624	Baliasasan	1	Sajani Majhi	52	1	2	1	1	2	2			2			8	2	2	1	1	2	3														7			1	3	3	1	2	3
2015-12-31	624004	624	Baliasasan	1	Kuntala Majhi	56	1	2	1	1	1	1	1	1	3			9	3	2	1	1				5												7			1	3	3	1	2	3	4
2015-12-31	624005	624	Baliasasan	1	Musi Majhi	62	1	2	1	1	2	2			3			9	3	1	1	1																7			1	3	4	1	2	3	4	5
2015-12-31	624006	624	Baliasasan	1	Dali Barik	40	2	2	1	1			2					4	2	2	1	1		3														7			1	3	2	1	2	3	4
2015-12-31	624007	624	Baliasasan	1	Rupei Khatoi	81	1	2		1	1	1			2			5	7	2	1								8									7			1	1	2	1	2			5
2015-12-31	624008	624	Baliasasan	1	Manorama Khatoi	55	1	2	1	1	1	1	1	1	1			7	2	1	2			3		5												7				2	2	1	2	3
2015-12-31	624009	624	Baliasasan	1	Chanchala Khatoi	45	1	2	1	1			2	1				5	1	1	2		2	3														7			1	2	2	1	2	3
2015-12-31	624010	624	Baliasasan	1	Kadhi Pradhan	60	1	1	1	1	1	1	1	3	1		2	11	3	1	1	1																7			1	4	4	1	2	3	4
2015-12-31	624011	624	Baliasasan	1	Ali Dalei	72	1	2		1	1	1			2			5	7	1	1								8									7			1	1	1	1
2015-12-31	624012	624	Baliasasan	1	Radhi Baral	65	1	2		1			2	1		1	1	6	7	1	1								8									7			1	1	1	1	2
2015-12-31	624013	624	Baliasasan	1	Susama Dalei	42	1	2	1	1				2	3		1	8	3	2	1	1		3														7			2	1	2	1	2	3	4
2015-12-31	624014	624	Baliasasan	1	Guna Bisoi	55	1	2		1	1	1			1			4	7	1	1								8									7			1	1	2	1	2
2015-12-31	624015	624	Baliasasan	1	Sukanti Pradhan	49	1	2	1	1			2	1				5	2	2	1	1	2															7			1	3	3	1	2		4
2015-12-31	624016	624	Baliasasan	1	Bidulata Nayak	46	2	2	1	1	1	1			1			5	3	2	1	1	2	3														7			1	2	2	1	2	3	4
2015-12-31	624017	624	Baliasasan	1	Laxmipriya Prusti	43	2	2		1	2	2			1			6	7	2	1								8									7			1	1	2	1	2	3	4
2015-12-31	624018	624	Baliasasan	1	Laba Nayak	52	2	2	1	1	1	1			1			5	2	1	2		2	3														7			1	2	2	1		3
2015-12-31	624019	624	Baliasasan	1	Sabitri Pradhan	68	1	2	1	1				1	3	1	1	8	1	2	1	1																7			1	2	2	1	2	3
2015-12-31	624020	624	Baliasasan	1	Laba Nayak(Husband-Brajakisor Nayak)	60	2	2	1	1	1	1	1		2			7	3	1	1							7										7			1	1	2	1	2	3
2015-12-31	624301	624	Baliasasan	4	Harasha Mallick	60	3	2	1	1	1	1	1	1				6	2	2	1			3										3							1	3	1	1	2	3
2015-12-31	624302	624	Baliasasan	4	Basant Mallick	61	3	2	1	1		1			2			5	2	3	1	1		3														7			2	1	1	1		3
2015-12-31	624303	624	Baliasasan	4	Santilata Mallick	40	3	2	1	1			1	1				4	2	1	2			3										3							2	2	1	1		3
2015-12-31	624304	624	Baliasasan	4	Ramamani Majhi	48	1	2	1	1	1	1			1			5	2	2	1	1		3														7			1	1	2	1	2	3
2015-12-31	624305	624	Baliasasan	4	Dulu Sahoo	62	2	2	1	1	1	1	1		2			7	2	1	1							7										7			1	1	2	1	2	3
2015-12-31	624306	624	Baliasasan	4	Sasmita Majhi	31	1	2	1	1					2			4	3	3	1	1				5												7			2	1	2	1	2	3	4
2015-12-31	624307	624	Baliasasan	4	Sundari Baral	58	1	2	1	1	3	3	4	1	3			16	2	1	1	1																7			1	3	2		2	3
2015-12-31	624308	624	Baliasasan	4	Pitei Rout	65	1	2	1	1					1		2	5	2	1	1	1																7			1	2	2			3
2015-12-31	624309	624	Baliasasan	4	Arnapurna Bhatta	44	1	2		1	1	1		1				4	7	3	1								8									7			1	1	2	1	2	3
2015-12-31	624310	624	Baliasasan	4	Bani Khatei	49	1	2	1	1			1	1	1			5	1	1	2		2	3														7			1	2	2	1	2	3
2015-12-31	624311	624	Baliasasan	4	Nabi Baral	60	1	2	1	1	3	2		1	3			11	3	1	1	1																7			1	3	2	1	2	3	4
2015-12-31	624312	624	Baliasasan	4	Sarojini Baral	49	1	2		1	2	1		2				6	7	1	1								8									7			1	2	2	1	2	3	4
2015-12-31	624313	624	Baliasasan	4	Sulochana Nayak	38	2	2	1	1			1	1			1	5	3	1	1	1																7			2	1	2	1		3
2015-12-31	624314	624	Baliasasan	4	Satyabhama Sahoo	60	2	2	1	1	1	1	1		2			7	3	2	1					5												7			1	2	2	1	2	3	4
2015-12-31	624315	624	Baliasasan	4	Basanti Dash	63	1	2	1	1	2	2	1					7	2	1	1							7										7			1	2	1	1	2	3	4
2015-12-31	624316	624	Baliasasan	4	Pramamani Nayak	52	2	2	1	1			3				1	6	2	2	2			3														7			1	3	2	1	2	3	4
2015-12-31	624317	624	Baliasasan	4	Netramani Pradhan	82	1	2		1	2	2	1	2	1			9	7	2	1								8									7			1	2	3	1	2	3
2015-12-31	624318	624	Baliasasan	4	Benga Pradhan	60	1	2	1	1	2	2			3			9	1	1	1	1																7			1	3	2	1	2	3	4
2015-12-31	624319	624	Baliasasan	4	Pata Pradhan	58	1	2	1	1	1	1	1		1			6	3	2	1	1		3										3							1	2	2	1	2	3
2015-12-31	624320	624	Baliasasan	4	Manguli Muduli	46	2	2	1	1			3					5	2	2	1	1																7			1	2	2	1	2	3
[truncated: 101 more columns]
